1  
2 **Title: The Cultural Evolution of Vaccine Hesitancy: Modeling the Interaction between Beliefs**  
3 **and Behaviors**

4  
5 Authors: Kerri-Ann Anderson<sup>a,b</sup> and Nicole Creanza<sup>a,b</sup>

6  
7 Affiliations:

8 <sup>a</sup> Department of Biological Sciences, Vanderbilt University, Nashville, TN, USA 37212

9 <sup>b</sup> Evolutionary Studies Initiative, Vanderbilt University, Nashville, TN, USA 37212

10  
11 Correspondence: [nicole.creanza@vanderbilt.edu](mailto:nicole.creanza@vanderbilt.edu)

12

13 **Abstract**

14

15 Health perceptions and health-related behaviors can change at the population level as  
16 cultures evolve. In the last decade, despite the proven efficacy of vaccines, the developed world  
17 has seen a resurgence of vaccine-preventable diseases (VPDs) such as measles, pertussis, and  
18 polio. Vaccine hesitancy, an individual attitude influenced by historical, political, and socio-  
19 cultural forces, is believed to be a primary factor responsible for decreasing vaccine coverage,  
20 thereby increasing the risk and occurrence of VPD outbreaks. In recent years, mathematical  
21 models of disease dynamics have begun to incorporate aspects of human behavior, however they  
22 do not address how beliefs and motivations influence these health behaviors. Here, using a  
23 mathematical modeling framework, we explore the effects of cultural evolution on vaccine  
24 hesitancy and vaccination behavior. With this model, we shed light on facets of cultural evolution  
25 (vertical and oblique transmission, homophily, etc.) that promote the spread of vaccine  
26 hesitancy, ultimately affecting levels of vaccination coverage and VPD outbreak risk in a  
27 population. In addition, we present our model as a generalizable framework for exploring cultural  
28 evolution when humans' beliefs influence, but do not strictly dictate, their behaviors. This model  
29 offers a means of exploring how parents' potentially conflicting beliefs and cultural traits could  
30 affect their children's health and fitness. We show that vaccine confidence and vaccine-conferred  
31 benefits can both be driving forces of vaccine coverage. We also demonstrate that an assortative  
32 preference among vaccine-hesitant individuals can lead to increased vaccine hesitancy and lower  
33 vaccine coverage.

34 **1. Introduction**

35  
36 Niche construction is a process in which organisms modify their local environment, thus  
37 altering selection pressures on themselves and the other organisms in that environment [1,2]. In  
38 *cultural* niche construction, humans modify their cultural environments—such as their beliefs,  
39 behaviors, preferences, and social contacts—in ways that subsequently alter evolutionary  
40 pressures on themselves and/or their culture [2]. Mathematical models of niche construction  
41 have traditionally been used in a biological and ecological context. More recently, this type of  
42 model has been expanded to explain the evolution of cultural behaviors, with applications to  
43 religion, fertility, and the evolution of large-scale human conflict [2–7]. Cultural niche  
44 construction theory recognizes that human evolution is in part directed by human behaviors. As  
45 such, using a niche construction framework allows for the exploration of a broader range of  
46 complex feedback scenarios resulting from selection pressures that may be caused by—or act  
47 upon—non-genetic traits. It may also provide insight into how otherwise deleterious traits  
48 become beneficial in certain environments and thus spread in a population [1]. Here, we propose  
49 a cultural niche construction model of the interactions between beliefs and behaviors, in which  
50 an individual’s beliefs influence their behaviors, and these belief-behavior interactions can be  
51 affected by and shape the broader cultural landscape. We apply this model to the interactions  
52 between vaccine-related beliefs, such as vaccine hesitancy of individual parents, and vaccination  
53 behaviors, such as a pair of parents vaccinating their offspring. Modeling the belief-behavior  
54 interactions underlying vaccination coverage using a cultural niche construction framework  
55 allows us to better understand how vaccination “cultures” are formed and how they can be  
56 transformed to promote public health.

57 Understanding vaccination behaviors is a crucial aspect of preventing infectious disease  
58 outbreaks. The implementation of childhood vaccination policies has led to the eradication of  
59 smallpox and the elimination of poliomyelitis (polio) in the United States [8–10]. The high efficacy  
60 of the measles vaccine, combined with wide vaccine acceptance in developed countries, had  
61 resulted in measles previously being targeted for elimination by 2020 [11]. However, over the  
62 past decade, there has been a resurgence of vaccine-preventable diseases (VPDs) in developed  
63 countries despite the safety and efficacy of vaccines and high overall childhood vaccination rates  
64 [12–15]. Vaccine hesitancy, named one of the World Health Organization’s ten threats to global  
65 health in 2019 [16], is believed to be responsible for decreasing vaccination coverage and thus

66 increasing the risk of vaccine-preventable disease outbreaks worldwide [17]. Vaccine hesitancy is  
67 a complex and context-specific individual attitude influenced by multiple factors, such as  
68 complacency (the belief that vaccination is unnecessary when the perceived risk of VPDs is low),  
69 convenience (the accessibility and affordability of vaccines), and confidence (the level of trust in  
70 the efficacy and safety of the vaccine, and in the healthcare system) [15,18]. Additionally, anti-  
71 vaccine sentiments are still on the rise despite well-documented vaccine efficacy and safety,  
72 including numerous studies debunking the spurious connection between vaccines and autism  
73 [19] and other anti-vaccination arguments [20]. The spread of these sentiments and disease  
74 outbreak risk are further exacerbated by homophily—the tendency of individuals to choose social  
75 contacts and mates who are similar to themselves [6,7,21,22]. Network-based simulations  
76 suggest that individuals with similar vaccine-hesitant opinions form groups that are more  
77 susceptible to vaccine-preventable diseases, impeding the attainment of herd immunity and  
78 substantially increasing the likelihood of disease outbreak in these clusters [23].

79 Even though some epidemiological models have begun to include aspects of human behavior  
80 (e.g [24–26]), these models do not typically incorporate the effects of population beliefs and  
81 changing cultural landscapes on disease transmission. For example, established epidemiological  
82 models such as the Susceptible-Infected-Recovered (SIR) model have been modified to include a  
83 vaccination component that can be useful in determining the intensity of intervention needed to  
84 address an epidemic [27]; however these models do not generally address fluctuations in  
85 vaccination rates or lower-than-expected rates of adoption based on cultural factors. One  
86 notable exception is a recent study in which an SIR model of a contagious disease was paired with  
87 another SIR model in which vaccine hesitancy is treated as a “cultural contagion”; this model  
88 showed that the spread of anti-vaccine sentiment could cause epidemics that would otherwise  
89 not have occurred [28]. However, it is still important that we understand how parents’ beliefs,  
90 which may differ from one another, interact with their perceptions of the relative risks of disease  
91 and vaccines to shape the decision to vaccinate their children, which in turn affects the future risk  
92 of vaccine-preventable disease outbreaks. Indeed, belief systems can act as the main barrier to  
93 vaccination, as opposed to lack of vaccine access, particularly in wealthier countries [23,29]. For  
94 example, increasing rates of non-medical exemption from vaccines (exemption on the basis of  
95 religious, philosophical, and personal beliefs), have been observed in the United States [30,31].  
96 Without these considerations, models commonly used in public health may be misleading; thus,  
97 understanding and incorporating the underlying health cultures and their evolution, including the

98 interplay between beliefs and behaviors, will allow us to build more comprehensive and  
99 representative models of vaccination dynamics and better support public health efforts.

100 In this study, we model the development and spread of vaccine hesitancy and childhood  
101 vaccination through a cultural evolution framework, incorporating the transmission of vaccine  
102 attitudes both from parents and from the community. We aim to assess the dynamic interactions  
103 between beliefs (shaped by social interactions) and behaviors (influenced by these beliefs). Using  
104 vaccine hesitancy and vaccination behaviors as a focal example of belief-behavior interactions,  
105 we explore the situations in which vaccine hesitancy is most likely to spread, potentially reducing  
106 childhood vaccination rates and leading to an increase in vaccine-preventable disease outbreaks.  
107 In addition, we consider that the perception of the relative risks of a disease and its preventive  
108 vaccine can fluctuate based on the prevalence of vaccination [26], such that the population's  
109 vaccination coverage can influence the decision to vaccinate one's children. Finally, we take into  
110 account that the decision to vaccinate a child is often the joint consideration of two individuals  
111 who might have different vaccine attitudes, and we further incorporate homophily (assortative  
112 mating) to understand how social subcultures might influence parental behaviors. Overall, we  
113 propose that a generalizable modeling framework for belief-behavior interactions can help  
114 inform public health strategies by improving our understanding of the cultural dynamics of  
115 vaccine hesitancy.

116

## 117 **2. Methods**

118

119 To model the evolution of vaccine beliefs and behaviors, we build on the cultural niche  
120 construction framework of [6] to assess the effects of vaccine attitudes on vaccination behaviors  
121 and on the resulting vaccination culture. We use this adapted model to explore how vaccination  
122 patterns evolve in a population when a cultural trait, such as vaccine hesitancy, can influence but  
123 not perfectly predict a behavior, such as vaccinating one's children.

124 We consider two cultural traits: **V**, a vaccination trait, and **A**, a vaccine attitude trait. Each  
125 trait has two possible states,  $V^+$  (vaccinated) or  $V^-$  (unvaccinated) and  $A^+$  (vaccine confident) or  $A^-$   
126 (vaccine hesitant), respectively. Thus, there are four possible phenotypes:  $V^+A^+$  (type 1:  
127 vaccinated and confident),  $V^+A^-$  (type 2: vaccinated and hesitant),  $V^-A^+$  (type 3: unvaccinated and  
128 confident), and  $V^-A^-$  (type 4: unvaccinated and hesitant), whose population frequencies are  
129 denoted by  $x_1, x_2, x_3$ , and  $x_4$ , respectively, with  $\sum_{i=1}^4 x_i = 1$ .

130  
131  
132

**Table 1: List of parameters, their definitions, and default or initial values**

| Parameter                            | Meaning                                                                                                                                                                           | Parameter                                                                       | Meaning                                                                                                                                                            |
|--------------------------------------|-----------------------------------------------------------------------------------------------------------------------------------------------------------------------------------|---------------------------------------------------------------------------------|--------------------------------------------------------------------------------------------------------------------------------------------------------------------|
| <b>V</b>                             | Vaccination state ( $V^+$ vaccinated, $V^-$ unvaccinated)                                                                                                                         | <b>A</b>                                                                        | Vaccine attitude ( $A^+$ confident, $A^-$ hesitant)                                                                                                                |
| $m_{ij}$                             | Mating frequencies (given in <b>Table S1</b> )                                                                                                                                    | $\alpha_k$                                                                      | Assortative mating parameter (homophily)<br><b>Default: <math>\alpha_1 = 0, \alpha_2 = 0</math></b>                                                                |
| $B_{m,n}$                            | Probability that parental pairs vaccinate their children, which depends upon the parents' vaccination states ( $b_m$ ) and vaccine attitude ( $c_n$ ) (given in <b>Table S2</b> ) | $C_n$                                                                           | Probability that parental pairs transmit vaccine confidence to their children<br><b>Default: <math>C_0 = 0.01, C_1 = C_2 = 0.5, C_3 = 0.99</math></b>              |
| $b_m$                                | Probability that parental pairs support offspring vaccination given their vaccination states<br><b>Default: <math>b_0 = 0.01, b_1 = b_2 = 0.5, b_3 = 0.99</math></b>              | $c_n$                                                                           | Probability that parental pairs support offspring vaccination given their vaccine attitude<br><b>Default: <math>c_0 = 0.01, c_1 = c_2 = 0.5, c_3 = 0.99</math></b> |
| $\sigma$                             | Comprehensive selection coefficient for $V^+$ , dependent on the population-wide vaccination rate (see <b>Figure 1</b> )                                                          | $\sigma_{\max}$                                                                 | The highest additional benefit that can be conferred by vaccination<br><b>Default: <math>\sigma_{\max} = 0.1</math></b>                                            |
| <b>Initial Phenotype Frequencies</b> |                                                                                                                                                                                   | $x_1(V^+A^+) = 0.81, x_2(V^+A^-) = 0.1, x_3(V^-A^+) = 0.07, x_4(V^-A^-) = 0.02$ |                                                                                                                                                                    |

133  
134 The attitude trait (**A**) can influence the dynamics of the vaccination trait (**V**) in two ways:  
135 by affecting the likelihood that couples vaccinate their offspring, and by determining with whom  
136 each adult will preferentially pair in assortative interactions. The state of the vaccine attitude trait  
137 (**A**) informs the value of an assortative mating parameter ( $\alpha_k$ ), which measures the departure  
138 from random mating. We define a 'choosing parent', arbitrarily, as the first member of each  
139 mating pair. The choosing parent's **A** state dictates the level of assortative mating, that is, the  
140 degree to which an individual of a given **A** state will preferentially mate with another individual of  
141 the same state, expressed by parameters  $\alpha_k$  where  $k = \{1, 2\}$  and  $0 \leq \alpha_k \leq 1$  (**Table S1**). If the  
142 choosing parent is  $A^+$ , this individual mates preferentially with other  $A^+$  individuals with  
143 probability  $\alpha_1$ , and mates randomly with probability  $1 - \alpha_1$ , whereas if the choosing parent is  $A^-$ ,

144 this individual mates preferentially with other  $A^-$  individuals with probability  $\alpha_2$ , and mates  
145 randomly with probability  $1-\alpha_2$ . There are sixteen possible mating pairs from the four  
146 phenotypes described, and we use the notation  $m_{i,j}$  to indicate the frequency of a mating  
147 between a choosing parent of type  $i$  and the second parent of type  $j$  where  $i, j = \{1, 2, 3, 4\}$  (**Table**  
148 **S1**); for example,  $m_{1,3}$  represents the mating frequency of  $V^+A^+$  ( $x_1$ ) and  $V^-A^+$  ( $x_3$ ).

149 Since the two traits (**A** and **V**) are transmitted vertically, for each phenotype we must specify  
150 the probability that the mating produces an offspring of that phenotype. The vaccine confidence  
151 trait ( $A^+$ ) is transmitted with probability  $C_n$ , and the vaccine hesitancy trait ( $A^-$ ) is transmitted with  
152 probability  $1-C_n$  (for  $n = \{0, 1, 2, 3\}$ ) as shown in **Tables 2** and **Table S2**). If  $C_0 = 0$ , two  $A^-$  parents  
153 will always produce  $A^-$  offspring, and if  $C_3 = 1$ , two  $A^+$  parents will always produce  $A^+$  offspring.  
154 However, if  $C_0 > 0$ , two  $A^-$  parents can produce  $A^+$  offspring at some probability, and similarly if  $C_3$   
155  $< 1$ , two  $A^+$  parents can produce  $A^-$  offspring with some probability.

156 Transmission of vaccination ( $V^+$  with probability  $B_{m,n}$  for  $m, n = \{0, 1, 2, 3\}$ ; **Table 1**) is more  
157 complex, since parents' vaccine attitudes (**A**), in addition to their own vaccination states (**V**), can  
158 influence their behavior in vaccinating their offspring via a set of "influence parameters" that  
159 inform vaccination probabilities. The probability that each mating pair produces an offspring with  
160 the  $V^+$  trait (i.e. vaccinates their offspring) is a scaled product of the influence of parental  
161 attitudes ( $c_n$  for  $n = \{0, 1, 2, 3\}$ ) and the influence of parental vaccination states ( $b_m$  for  $m = \{0, 1, 2,$   
162  $3\}$ ) (**Tables 2** and **Table S2**). For example, for mating pair  $V^+A^+ \times V^+A^-$ , the combined vaccination  
163 states ( $V^+ \times V^+$ ) will influence vaccination behavior by  $b_3$ , and the combined attitude states, ( $A^+ \times$   
164  $A^-$ ), will influence vaccination behavior by  $c_2$ . Therefore, a  $V^+A^+ \times V^+A^-$  mating will produce a  $V^+$   
165 offspring with probability  $B_{3,2} = c_2 \left( \frac{1+b_3}{2} \right)$ ; this pair will also produce an  $A^+$  offspring with  
166 probability  $C_2$  based on their combined attitude states. Thus, according to the model, this pairing  
167 will produce a  $V^+A^+$  offspring with probability  $B_{3,2}C_2$  and a  $V^+A^-$  offspring with probability  
168  $B_{3,2}(1-C_2)$ . We note that assortative mating ( $\alpha_k > 0$ ) will increase the frequency of matings between  
169 individuals that share an attitude trait, with these non-random interactions in turn skewing  
170 vaccination outcomes toward those of same-state couples (via  $c_0$  and  $c_3$ ).

171 Transmission and influence probabilities are constant throughout a single simulation, with  
172 values ranging from 0 to 1. At default settings, the influence parameters  $b_m$  and  $c_n$ , and the  
173 transmission parameter  $C_n$  would take the following values:  $C_0, b_0, c_0 = 0.01$ ;  $C_1, C_2, b_1, b_2, c_1,$   
174  $c_2 = 0.5$ ; and  $C_3, b_3, c_3 = 0.99$ . In our model, the influence of parental vaccine beliefs ( $c_n$ ) is greater

175 than the influence of their own vaccination status ( $b_n$ ) on their likelihood of vaccinating their  
 176 offspring, so offspring vaccination is guaranteed at some probability only if  $c_n > 0$ .

177  
 178 **Table 2: Presence (+) and absence (-) subscript assignments.** Demonstrating the trait presence (+) and  
 179 absence (-) combinations associated with  $m$ ,  $n$  subscripts. For example, the  $+ \times -$  combinations is  
 180 associated with  $m$  and  $n$  subscript value 2: an  $A^+ \times A^-$  pairing transmits  $A^+$  at probability  $C_2$ . This rule applies  
 181 to parameters  $C_n, b_m, B_{m,n}, c_n$ , as shown in **Table S2**.

| Subscript Value ( $m, n$ ; e.g. $b_m, C_n$ ) | Associated Pairing (e.g. $V \times V, A \times A$ ) |
|----------------------------------------------|-----------------------------------------------------|
| 0                                            | $- \times -$                                        |
| 1                                            | $- \times +$                                        |
| 2                                            | $+ \times -$                                        |
| 3                                            | $+ \times +$                                        |

183  
 184 Transmission and influence probabilities are constant throughout a single simulation, with  
 185 values ranging from 0 to 1. At default settings, the influence parameters  $b_m$  and  $c_n$ , and the  
 186 transmission parameter  $C_n$  would take the following values:  $C_0, b_0, c_0 = 0.01$ ;  $C_1, C_2, b_1, b_2, c_1,$   
 187  $c_2 = 0.5$ ; and  $C_3, b_3, c_3 = 0.99$ . In our model, the influence of parental vaccine beliefs ( $c_n$ ) is greater  
 188 than the influence of their own vaccination status ( $b_n$ ) on their likelihood of vaccinating their  
 189 offspring, so offspring vaccination is guaranteed at some probability only if  $c_n > 0$ .

190 The cultural selection pressure on vaccination is given by the parameter  $\sigma$ , such that the  
 191 frequency of the  $V^+A^+$  and  $V^+A^-$  phenotypes are multiplied by  $1+\sigma$  after vertical cultural  
 192 transmission has occurred. At the end of each timestep, the frequency of each phenotype is  
 193 divided by the sum of all four frequencies, ensuring that the frequencies sum to 1. This cultural  
 194 selection coefficient is implemented in the same way as a selection coefficient in a population-  
 195 genetic model, but unlike the latter, it is structured to encompass both biological fitness and  
 196 cultural selection pressures, including perceived risks or benefits of the vaccine itself, personal  
 197 cost-benefit analyses of preventative health behaviors, and the structural or societal-level factors  
 198 influencing vaccination rates [32,33]. This parameter modulates whether there are more or fewer  
 199 vaccinated individuals than expected: in other words, when  $\sigma > 0$ , vaccinated individuals are more  
 200 common in a set of offspring than would be expected strictly based on the beliefs and vaccination  
 201 statuses of their parents. We calculate  $\sigma$  in each timestep as a function of the current vaccination



202 coverage (frequency of  $V^+$ , i.e.  $x_1 + x_2$ ), and in each simulation we specify  $\sigma_{max}$  as the maximum  
 203 cultural selection pressure of getting vaccinated ( $-1 \leq \sigma_{max} \leq 1$ ) (see the cultural selection coefficient  
 204 function in **Figure 1**). This function was constructed by fitting a curve to pre-specified conditions  
 205 that incorporate assumptions from evolutionary game theory (e.g. that herd immunity decreases  
 206 the incentive to vaccinate [34]): we assume that when vaccination coverage is low, the real and  
 207 perceived benefits of vaccination are highest, and thus, the cultural selection pressure is near  
 208  $\sigma_{max}$ , however, as vaccination coverage increases, the perceived benefits of vaccination decrease  
 209 and the cultural selection pressure is reduced (**Figure 1**).  
 210

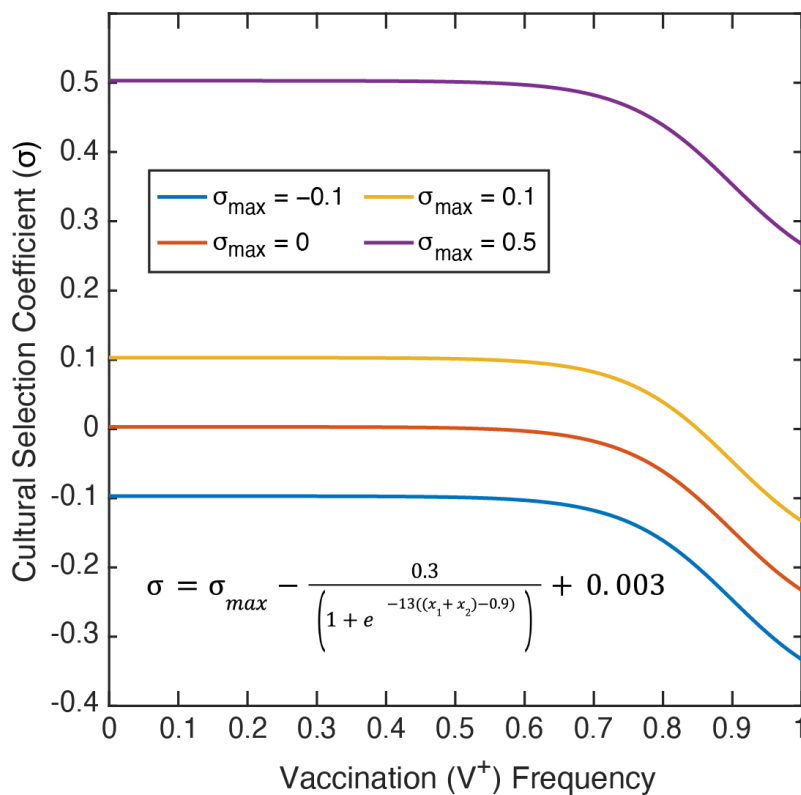

211  
 212 **Figure 1: Cultural selection coefficient function.** The cultural selection coefficient function was  
 213 constructed by fitting a curve to specified conditions, and considers both health and non-health related  
 214 effects. The selection coefficient ( $\sigma$ ; vertical axis) is dependent on the frequency of vaccinated individuals  
 215 ( $V^+$ ) in the population (horizontal axis).  $\sigma_{max}$  is the maximum cultural selection coefficient associated with  
 216 being vaccinated. Perceived vaccine benefit is reduced as vaccination coverage increases, since the  
 217 negative effects of the disease will be less apparent. Note: Of the  $\sigma_{max}$  values shown, only  $\sigma_{max} = 0.1$  allows  
 218 the cultural selection pressure to be either positive or negative at a given timepoint depending on the  
 219 frequency of vaccination.  
 220

221 Thus far, we have described vertical cultural transmission from parent to offspring. The  
 222 model also incorporates a second phase with oblique cultural transmission (i.e. influence from

223 non-parental adults), in which individuals can change their inherited vaccine attitudes (**A**) due to  
 224 influence from other adults in the population. There are two probabilities associated with  
 225 attitude modulation: the probability that a vaccine hesitant ( $A^-$ ) individual adopts the vaccine  
 226 confident ( $A^+$ ) state ( $A^-$  to  $A^+$  transition probability, given by  $A_{\rightarrow Confident}$  in **Figure 2**), and the  
 227 probability that an  $A^+$  individual adopts the  $A^-$  state ( $A^+$  to  $A^-$  transition probability, given by  
 228  $A_{\rightarrow Hesitant}$  in **Figure 2**). As with the strength of cultural selection ( $\sigma$ ) described previously (**Figure**  
 229 **1**), the probability that offspring change their vaccine attitude is a function of the  $V^+$  frequency in  
 230 the population, constructed according to similar assumptions given in **Figure 2**. As the frequency  
 231 of vaccinated individuals ( $V^+$ ) increases in the population, vaccine-confident individuals ( $A^+$ ) are  
 232 more likely to become hesitant ( $A_{\rightarrow Hesitant}$  probability increases) and vaccine-hesitant individuals  
 233 ( $A^-$ ) are less likely to become confident ( $A_{\rightarrow Confident}$  probability decreases).  
 234

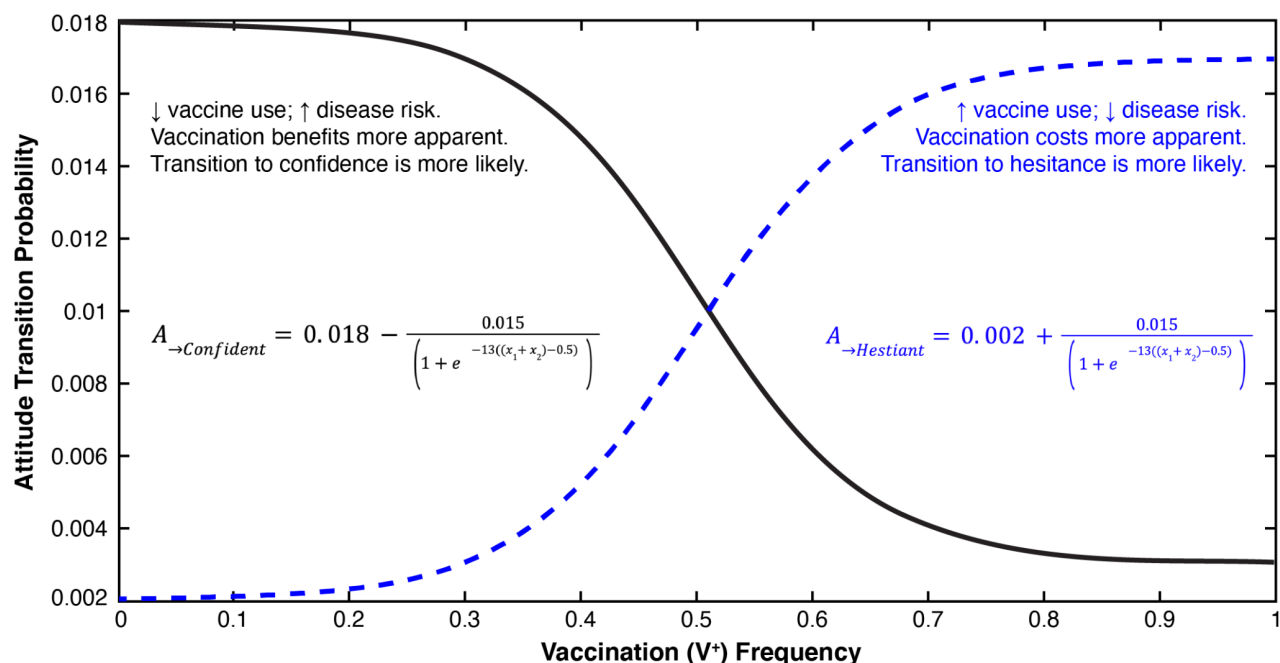

235  
 236 **Figure 2: Attitude Transition Probability Function.** Attitude transition probability functions were  
 237 constructed by fitting a curve to specified values based on the assumptions pictured. Attitude transition  
 238 probability (vertical axis) is a function of the vaccination frequency in the population ( $V^+$ ; horizontal axis).  
 239 The probability that a vaccine hesitant individual adopts vaccine confidence ( $A^-$  to  $A^+$  transition probability,  
 240 shown in black) is determined by the function  $A_{\rightarrow Confident}$ , and the probability that a vaccine confident  
 241 individual adopts vaccine hesitancy ( $A^+$  to  $A^-$  transition probability, shown with a blue dashed line) is  
 242 determined by the function  $A_{\rightarrow Hesitant}$ .  
 243

244 To compute the frequency of a given phenotype in the next iteration, we sum the  
 245 probability that each mating pair produces offspring of that phenotype over each of the sixteen

246 possible mating pairs. Cultural selection ( $\sigma$ ), described above, then operates on offspring with the  
247  $V^+$  trait. The full recursions, giving  $x_i'$  phenotype frequencies in the next iteration in terms of  $x_i$  in  
248 the current iteration, are given in **Text S1**. If  $x_i'$  is equal to  $x_i$ , the system is at equilibrium. As we  
249 do not incorporate a birth-death process or population asynchrony in this model, iterations in the  
250 discrete-time format of our model should not be strictly interpreted as years or generations. We  
251 instead interpret each iteration broadly as a timeframe in which the specified cultural  
252 interactions could occur, which varies among individuals, populations, and cultures. Unless  
253 otherwise stated, the model is initialized with phenotypic frequencies based on United States  
254 data:  $x_1$  (frequency of  $V^+A^+$ ) = 0.81,  $x_2$  ( $V^+A^-$ ) = 0.1,  $x_3$  ( $V^-A^+$ ) = 0.07,  $x_4$  ( $V^-A^-$ ) = 0.02. These  
255 frequencies were estimated using reports of Measles-Mumps-Rubella (MMR) vaccination rates  
256 and estimates of vaccine attitude frequencies obtained from various sources in the literature  
257 [35,36] and the Centers of Disease Control ChildVax database [37,38].

258

### 259 **3. Results**

260

261 To test our model, we first initialized a population with a set of phenotype frequencies  
262 and examined the changes in these frequencies over time with a given set of parameters (**3.1**).  
263 Then, we evaluated the effects of each parameter by running simulations at multiple parameter  
264 combinations and recording the population frequencies of each phenotype once the system  
265 approached an equilibrium (**3.2–3.4**). In our first set of simulations (**3.1–3.3**), we include only  
266 vertical transmission dynamics, i.e. only parent-to-offspring transmission, varying parameter  
267 values in turn to test their effects on population vaccination behavior and attitudes. In the  
268 vertical transmission phase of the model, parents choose whether to vaccinate their offspring  
269 (i.e., transmit  $V^+$ ) or to not vaccinate ( $V^-$ ), and parents also transmit a vaccine attitude  
270 (confidence,  $A^+$ , or hesitancy,  $A^-$ ), each with a specified probability given the phenotypes of the  
271 parents. The parental attitude state, vaccination status, assortative mating levels, and cultural  
272 selection parameters interact to affect vaccination coverage (frequency of  $V^+$  in the population)  
273 and vaccine confidence (frequency of  $A^+$ ).

274

#### 275 **3.1. Temporal dynamics of vaccine-related beliefs and behaviors**

276

277 To test whether the equilibrium phenotype frequencies were sensitive to starting  
 278 frequencies, we plotted the dynamics of each phenotype over time at default parameters (given  
 279 in **Table 1**). For each set of initial phenotype proportions tested, the phenotype frequencies in  
 280 the population quickly adjusted to approach equilibrium values and then gradually plateaued to a  
 281 stable equilibrium (vertical transmission: **Figure 3 and Figure S1**, vertical+oblique transmission:  
 282 **Figure S2**. This demonstrates that equilibrium frequencies of vaccination coverage and vaccine  
 283 confidence are determined by the parameter conditions rather than by the initial frequencies  
 284 themselves.

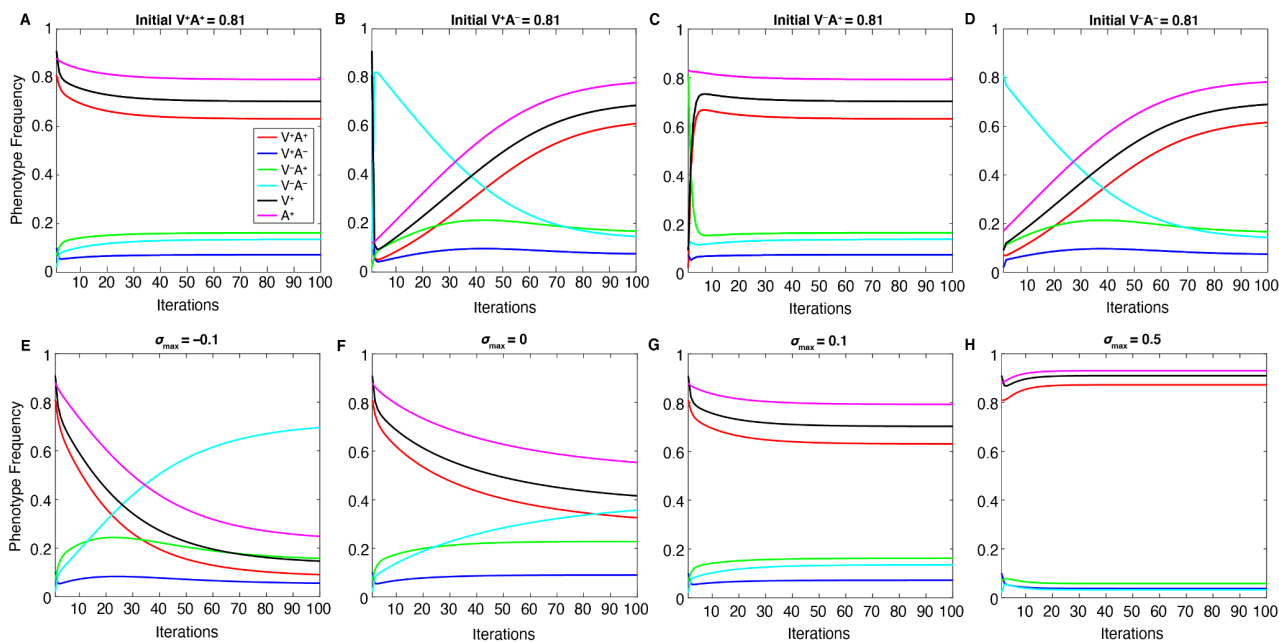

285  
 286  
 287 **Figure 3: Equilibrium frequencies are determined by the parameter space, not by initial frequencies.** The  
 288 change in each of the four phenotype frequencies and the total  $V^+$  and  $A^+$  frequencies (vertical axis) over  
 289 100 iterations of the model **with vertical transmission only** (horizontal axis). **Top Row:** Initial frequencies  
 290 are varied, such that we begin each simulation with a different phenotype at an initial high frequency  
 291 (0.81):  $V^+A^+$  in panel **A**,  $V^-A^+$  in panel **B**,  $V^+A^-$  in panel **C**,  $V^-A^-$  in panel **D**; the remaining phenotypes are set  
 292 to lower frequencies (0.1, 0.07, 0.02). See **Figure S1** for a full listing of these initial frequencies. **Bottom**  
 293 **Row:** The maximum cultural selection coefficient ( $\sigma_{max}$ ) is varied: **E.**  $\sigma_{max} = -0.1$ ; **F.**  $\sigma_{max} = 0$ ; **G.**  $\sigma_{max} = 0.1$ ; **H.**  
 294  $\sigma_{max} = 0.5$ . Cultural selection against vaccinated individuals increases the frequency of  $V^-A^-$ , decreasing the  
 295 other frequencies (**E**), whereas increased cultural selection favoring vaccinated individuals increases  $V^+A^+$   
 296 frequencies while decreasing the other frequencies (**F, G, H**). In all panels, the remaining parameters are  
 297 held at default values (**Table 1**).

298  
 299 When two parameters in particular are varied—maximum cultural selection ( $\sigma_{max}$ ) or  
 300 confidence transmission ( $C_1 = C_2$ )—we observe a trade-off between the  $V^-A^-$  phenotype, which  
 301 dominates at lower values of these parameters, and the  $V^+A^+$  phenotype, which dominates at

302 higher values (**Figures 3-4**). Interestingly, the “conflicting” phenotypes (when an individual’s  
303 attitude toward vaccinating their children does not match their own vaccination state:  $V^-A^+$  and  
304  $V^+A^-$ ) are present at their highest frequencies at neutral cultural selection ( $\sigma_{\max} = 0$ , **Figure 3F**)  
305 and/or neutral confidence transmission ( $C_1 = C_2 = 0.5$ , **Figure 4B**). Vaccinated individuals have the  
306 same fitness regardless of their attitude (i.e.  $V^+A^+$  bears the same selection pressure as  $V^+A^-$ ), so it  
307 is worth noting that at higher levels of confidence transmission and cultural selection,  $V^+A^+$   
308 increases in frequency but  $V^+A^-$  decreases in frequency (compare **Figure 3F-G**, **Figure 4B-C**). This  
309 pattern seems to reflect their differing likelihoods of vaccinating their offspring: across all  
310 possible partners, vaccinated but vaccine-hesitant parents ( $V^+A^-$ ) are less likely to vaccinate their  
311 offspring than vaccinated and vaccine-confident parents ( $V^+A^+$ ), resulting in more  $V^-$  offspring.  
312 Thus, when  $V^+$  is favored by cultural selection, there is indirect selection against the vaccinated  
313 but vaccine-hesitant ( $V^+A^-$ ) phenotype (**Figure 3E-H**). Similarly, indirect selection against  $V^-A^+$   
314 occurs when  $V^-$  is favored by cultural selection (**Figure 3E**): compared to **Figure 3F**, we observe an  
315 increase in  $V^-A^-$  individuals but a decrease in  $V^-A^+$  individuals, who because of their vaccine  
316 confidence have more  $V^+$  offspring, which are culturally disfavored in this environment. When  
317 cultural transmission from non-parental adults (oblique transmission) was included, described in  
318 following sections, we observed similar patterns, but the final equilibria were more likely to be  
319 polymorphic, with vaccinated, unvaccinated, confident, and hesitant phenotypes stabilizing at  
320 more moderate frequencies than they would have with only vertical transmission (Compare  
321 **Figures 3-4 to Figures S3-S4**).

322 Low confidence transmission ( $C_1 = C_2 = 0.1$ , **Figure 4A**) increases the frequency of vaccine  
323 hesitancy ( $A^-$ ) in the population over time, increasing the probability that more couples choose  
324 not to vaccinate their offspring. However, the increase in vaccine hesitancy does not occur  
325 equally in vaccinated and unvaccinated individuals:  $A^-$  frequency may increase overall in this  
326 environment, but  $V^+A^-$  frequencies are lower and  $V^-A^-$  frequencies are higher (compared to  
327 **Figure 4B-C** and **Figure S4**). At neutral confidence transmission probabilities (i.e. when couples  
328 with one confident and one hesitant parent are equally likely to transmit either attitude), there is  
329 a higher chance that the vaccinated but vaccine-hesitant ( $V^+A^-$ ) phenotype is replenished.  
330 However, if vaccine confidence is highly transmitted ( $C_1 = C_2 = 0.8$ ), the  $V^+A^-$  frequency will be  
331 reduced, as this phenotype is more likely to produce  $A^+$  offspring than  $A^-$ , thus increasing  $V^+A^+$   
332 phenotype frequencies in the population (**Figure 4** and **Figure S4**). If we turn to the other  
333 conflicting phenotype, unvaccinated but vaccine-confident ( $V^-A^+$ ) individuals become more

334 common when  $A^+$  increases in frequency in the population as  $C_1 = C_2$  increases from 0.1 to 0.5  
 335 (**Figure 4** and **Figure S4**). In contrast, higher vaccine confidence transmission ( $C_1 = C_2 = 0.8$ ) can  
 336 lead to a vaccination-promoting environment in which  $V^-$  frequencies are reduced over time; thus  
 337 the  $V^-A^+$  phenotype becomes rare and  $V^+A^+$  predominates (**Figure 4** and **Figure S4**).

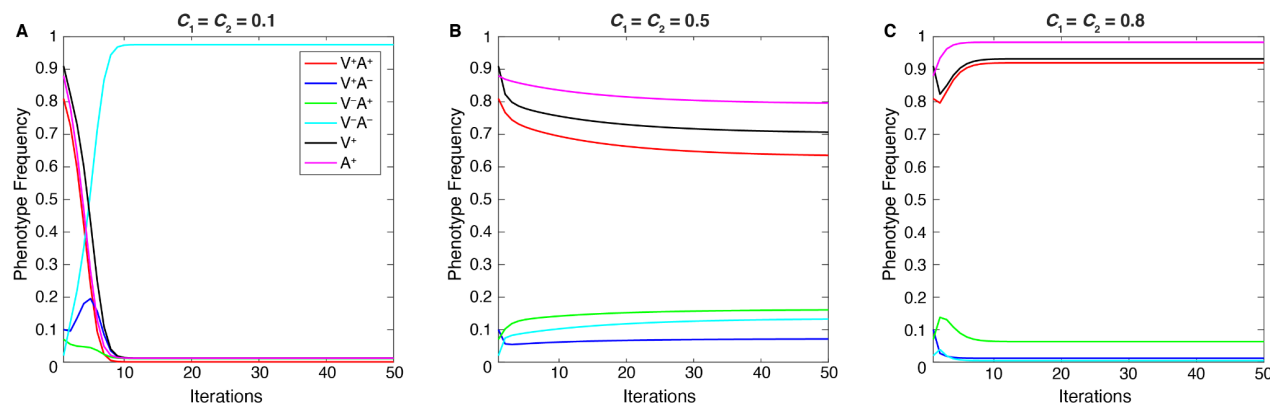

338  
 339 **Figure 4: Temporal Effects of Confidence Transmission.** The change in phenotype frequencies over 50  
 340 iterations as vaccine confidence transmission in mixed-attitude couples ( $C_1 = C_2$ ) is varied (**A.**  $C_1 = C_2 = 0.1$ ;  
 341 **B.**  $C_1 = C_2 = 0.5$ ; **C.**  $C_1 = C_2 = 0.8$ ) with vertical transmission only, while other parameters are held at default  
 342 values (**Table 1**). The population equilibrates at over 90%  $A^-V^-$  at low confidence transmission (A).  
 343 Increasing the probability of confidence transmission results in less vaccine hesitancy and, in turn, higher  
 344 vaccination frequencies ( $V^+A^+$ ).

### 345 3.2. Parent-to-Offspring Interactions (Simulations with vertical transmission only)

347  
 348 Since our assessment of the temporal dynamics (**3.1**) demonstrated that our simulations  
 349 approach stable equilibria, we then modulated different sets of parameters and recorded the  
 350 phenotype frequencies at equilibrium, generating heat maps showing the results across a range  
 351 of parameters. In the first of these, we tested the relationship between vaccination probability  
 352 and vaccine confidence transmission. To directly alter vaccination probabilities while still  
 353 accounting for the couple's vaccine attitudes, we set ranges of values for  $B_{m,n}$  that vary along the  
 354 horizontal axis of **Figure 5**, with the vaccination probability for two hesitant parents (e.g.  $B_{0,0}$ ) on  
 355 the lower end of the range and the vaccination probability for two confident parents (e.g.  $B_{3,3}$ ) on  
 356 the higher end of the range (**Table S3**). Confidence transmission probabilities are also structured  
 357 in this "range shift" manner (**Figure 5A-B, Table S3**). If we vary both confidence transmission  
 358 parameters and vaccination probability parameters by implementing range shifts in both  $C_n$  and  
 359  $B_{m,n}$ , we observe a positive interaction between confidence transmission and vaccination  
 360 probability: vaccination coverage increases as either of these parameters are increased (**Figure**  
 361 **5A**).

362

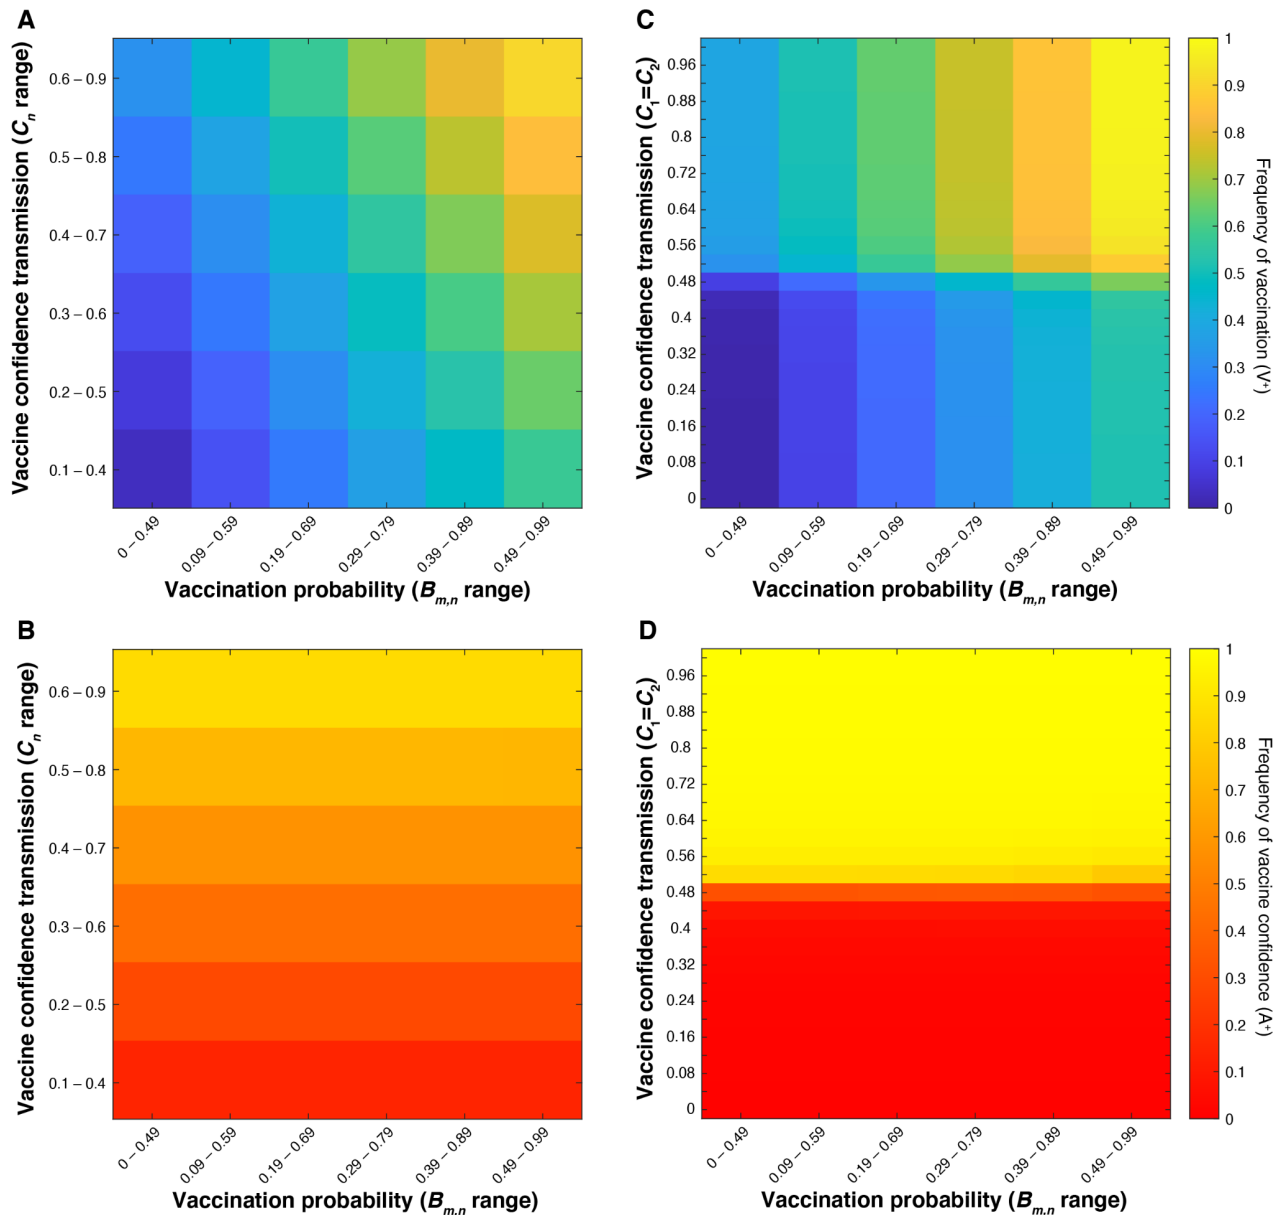

363

364 **Figure 5: Vaccination coverage levels are determined by an interaction between confidence**  
 365 **transmission and vaccination probability.** Heatmaps showing final vaccination coverage (A, C) and  
 366 corresponding vaccine confidence (B, D) after 100 time-steps with **no oblique transmission**. In A and B,  
 367 confidence transmission probabilities ( $C_n$ ) are set within the range indicated on the vertical axis, and  
 368 vaccination probabilities ( $B_{m,n}$ ) are set within the range indicated on the horizontal axis with  $B_{0,0}$ ,  $B_{1,0}$ ,  $B_{2,0}$   
 369 and  $B_{3,0}$  taking the lowest value and  $B_{3,3}$  taking the highest value (Table S3). In C and D, confidence  
 370 transmission in mixed-attitude couples ( $C_1 = C_2$ ) is varied along the vertical axis, while the vaccination  
 371 probabilities ( $B_{m,n}$ ) are set within the range indicated on the horizontal axis as in A and B. (Table S3). We  
 372 show increased equilibrium vaccination coverage with increasing vaccination probability and confidence  
 373 transmission probability ranges, while confidence levels are primarily dictated by proportion of the  
 374 population transmitting confidence or hesitancy.

375            However, couples with mixed vaccination and/or attitude states ( $V^+ \times V^-$ ,  $A^+ \times A^-$ ) are  
376 assumed to be more variable in their decision to vaccinate their offspring than parents who share  
377 the same state. Thus, in the simulations that follow, we primarily modulated the specific  
378 probabilities associated with these mixed-state pairings. In **Figure 5C-D**, we varied vaccination  
379 probabilities ( $B_{m,n}$ ) across the full range of individuals but modulated confidence transmission  
380 probabilities only for mixed-attitude couples ( $C_1 = C_2$ ), i.e. those with one vaccine-hesitant parent  
381 and one vaccine-confident parent. In these tests, we observe increasing equilibrium vaccination  
382 coverage as  $B_{m,n}$  probabilities increase, with higher coverage in high-confidence transmission  
383 environments (**Figure 5C-D**).

384            In both aforementioned simulations (**Figure 5**), we confirm vaccination coverage levels are  
385 determined by an interaction between confidence transmission and vaccination probability,  
386 whereas confidence levels are dictated primarily by levels of confidence transmission. In sum, the  
387 degree to which parents with mixed vaccine-hesitant and vaccine-confident attitudes transmit  
388 vaccine confidence instead of vaccine hesitancy to their offspring is a key factor in determining  
389 population trait majorities which can drastically shift population dynamics.

390            We compared the effects of varying the confidence transmission probabilities for mixed-  
391 attitude couples ( $C_1$  and  $C_2$ ) in combination with multiple factors: 1) the maximum cultural  
392 selection coefficient ( $\sigma_{\max}$ ) (**Figure 6A-B**), 2) the vaccination influence parameters  $b_1$  and  $b_2$   
393 (**Figure 6C-D**), 3) the attitude influence parameters  $c_1$  and  $c_2$  (**Figure 6E-F**), and 4) the vaccination  
394 probabilities of couples with mixed states,  $B_{1,1}$ ,  $B_{1,2}$ ,  $B_{2,1}$ ,  $B_{2,2}$  (**Figure 6G-H**). In each examination,  
395 we observed a  $C_n$  threshold: there is a mid-range value of  $C_n$  at which vaccination coverage and  
396 vaccine confidence traits are polymorphic (i.e. both forms of each trait coexist in the population),  
397 separating definitive high ( $\gtrsim 80\%$ ) and low ( $\lesssim 30\%$ ) levels of vaccination coverage and confidence.  
398 This  $C_n$  threshold value is more sensitive to  $\sigma_{\max}$  than to  $b_m$ ,  $c_n$ , or  $B_{m,n}$ : the threshold value is  
399 lowered as  $\sigma_{\max}$  increases (diagonal line in **Figure 6A-B**). Although vaccination probability ( $B_{m,n}$ ) is  
400 dependent on both  $c_n$ , the influence of parental vaccine attitude, and  $b_m$ , the influence of  
401 parental vaccination state (**Table S2**), modulating either type of influence of mixed-state parents  
402 has little effect on the level of vaccination coverage and negligible effects on confidence levels at  
403 each non-threshold  $C_n$  (**Figure 6C-F**).

404            Interestingly, direct modulation of the mixed-state couple vaccination probability ( $B_{1,1} =$   
405  $B_{1,2} = B_{2,1} = B_{2,2}$ ) also has little power in affecting coverage and confidence levels at equilibrium  
406 (**Figure 6G-H**). We hypothesize that predominantly high or predominantly low confidence



407 transmission within a population reduces the occurrence of “mixed-state” pairings, i.e. if the  
 408 majority of the population becomes confident or hesitant, there are fewer confident-hesitant and  
 409 vaccinated-unvaccinated pairings. Thus, the effect of modulating mixed-state vaccination  
 410 probabilities ( $B_{1,1}$ ,  $B_{1,2}$ ,  $B_{2,1}$ ,  $B_{2,2}$ ) is significantly minimized as these couples approach low  
 411 frequencies in the population, and confidence transmission dominates the vaccination patterns.  
 412

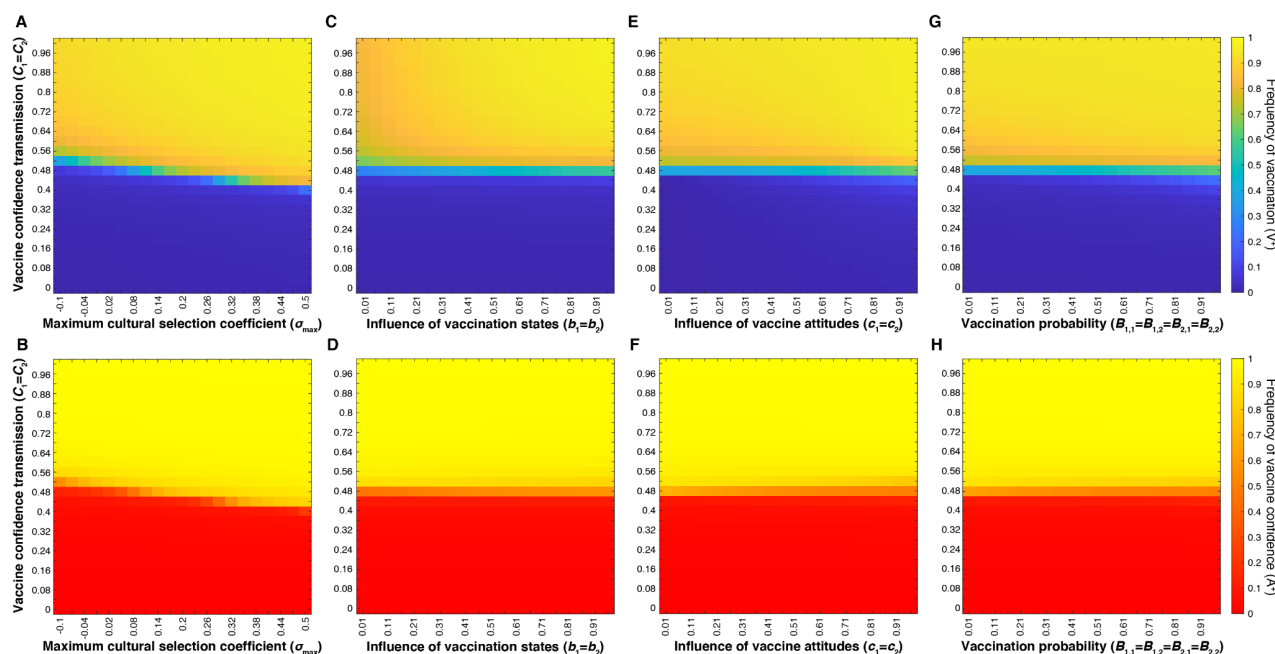

413  
 414 **Figure 6: Vaccine Confidence Transmission Dictates Vaccination Coverage and Confidence Levels**  
 415 Heatmaps showing final vaccination coverage and vaccine confidence after 100 time-steps with **no**  
 416 **oblique transmission**, only parent-to-offspring transmission. The top row (A, C, E, G) shows vaccination  
 417 coverage (i.e. frequency of  $V^+$  in the population) with low coverage in blue and high coverage in yellow;  
 418 the bottom row (B, D, F, H) shows the corresponding final vaccine confidence (i.e. frequency of  $A^+$ ), with  
 419 low confidence in red and high confidence in yellow. Unless varied on the horizontal or vertical axis, other  
 420 parameters are set to the default values given in **Table 1**. In our model, parents’ likelihood of vaccinating  
 421 their children depends on both their vaccination state and their attitude state. This figure shows that the  
 422 strength of parental transmission of vaccine confidence ( $C_n$ ) has a much stronger effect on the equilibrium  
 423 levels of both vaccine coverage ( $V^+$ ) and confidence ( $A^+$ ) than other parameters: the maximum cultural  
 424 selection coefficient,  $\sigma_{max}$  (A,B), the influence of parental vaccination state,  $b_m$  (C, D), the level of influence  
 425 of parental vaccine attitudes on their vaccination behaviors,  $c_n$  (E,F), and the probability that mixed-state  
 426 parents vaccinate their offspring  $B_{m,n}$  (G,H).  
 427

428 Next, we hold vaccine confidence transmission ( $C_n$ ) at default probabilities, reminiscent of  
 429 Mendelian transmission, such that two vaccine confident or two vaccine hesitant parents  
 430 predictably transmit their vaccine attitude, and parents with differing vaccine attitudes each have  
 431 a ~50% chance of transmitting their own state, e.g.  $C_0$  near 0,  $C_1$  and  $C_2$  at 0.5,  $C_3$  near 1 (**Table 1**).

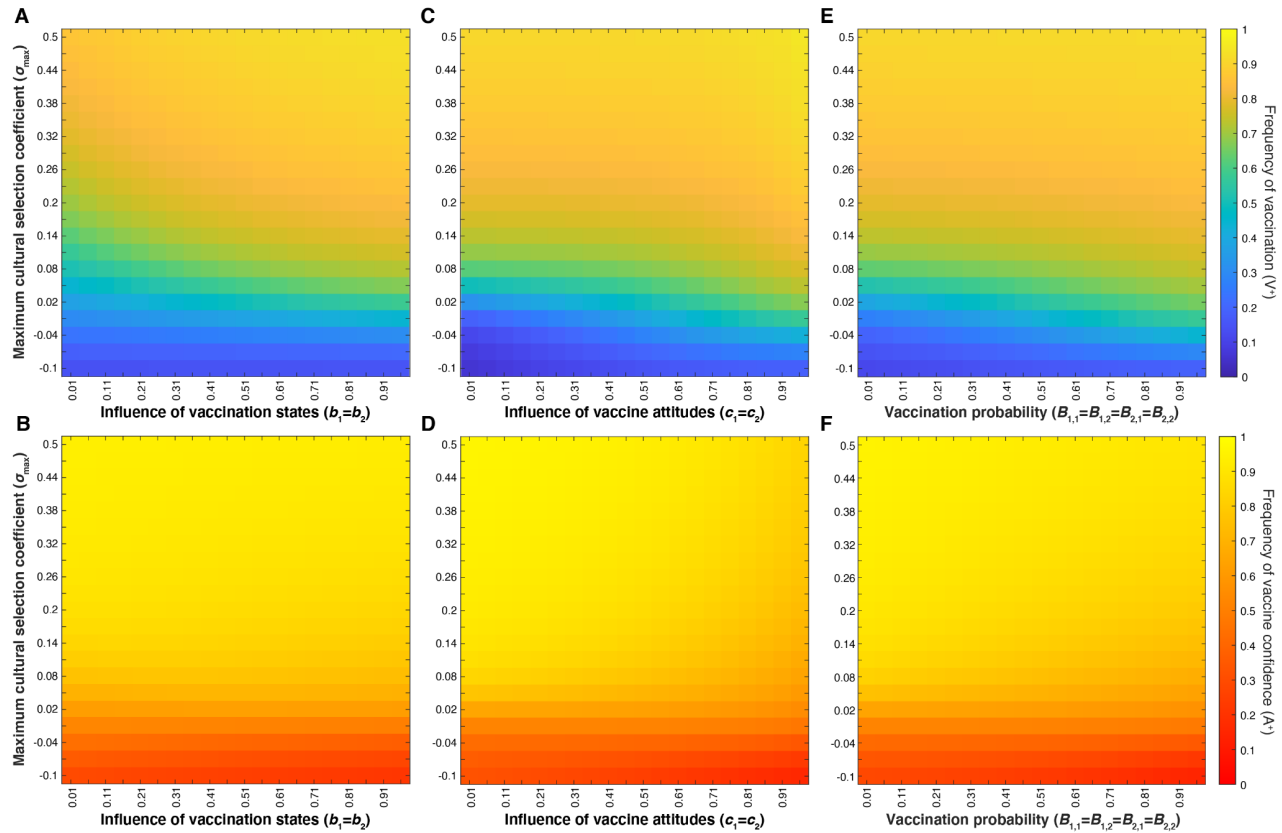

432  
 433 **Figure 7: Cultural Selection Influences Vaccination Coverage and Vaccine Confidence.** Heatmaps showing  
 434 final vaccination coverage (A, C, E) and final vaccination confidence (B, D, F) after 100 time-steps with **no**  
 435 **oblique transmission**, only parent-to-offspring transmission. As in previous figures, parameters not varied  
 436 here are given in **Table 1**. Parents' likelihood of vaccinating their children depends on both their  
 437 vaccination state and their attitude state. At default probabilities of vaccine confidence transmission ( $C_n$   
 438 values in **Table 1**), these figures show that modulating the maximum cultural selection coefficient affects  
 439 the equilibrium levels of vaccination coverage and vaccine confidence across the range of specified  
 440 parameters: parental vaccination state influence,  $b_m$  (A, B), parental attitude state influence,  $c_n$  (C,D), and  
 441 offspring vaccination probability,  $B_{m,n}$  (E,F). Unless directly modulated (as in panels E-F),  $B_{m,n}$  varies with  $b_m$   
 442 and  $c_n$ :  $B_{m,n} = c_n \left( \frac{1+b_m}{2} \right)$ .  
 443  
 444 We then varied cultural selection in combination with vaccination-associated probabilities ( $b_m$ ,  $c_n$ ,  
 445  $B_{m,n}$ ). With  $C_n$  held constant, cultural selection ( $\sigma_{max}$ ) is the primary factor determining vaccination  
 446 coverage and confidence levels (**Figure 7**). Raising the maximum cultural selection coefficient  
 447 increases the equilibrium level of vaccination coverage and vaccine confidence across various  
 448 levels of vaccination state influence ( $b_m$ ) (**Figure 7A-B**), vaccination attitude influence ( $c_n$ ) (**Figure**  
 449 **7C-D**), and vaccination probability ( $B_{m,n}$ ) (**Figure 7E-F**). Unlike in **Figure 6**, vaccine confidence does

450 not always mirror vaccination coverage across all levels of attitude influence ( $c_n$ ) or vaccination  
451 probabilities. Instead, vaccine confidence levels decline with increased  $c_n$  and increased  $B_{m,n}$  for  
452  $\sigma_{\max} \lesssim 0.3$  (**Figure 7D, F**), as well as for both increased  $c_n$  and increased  $b_m$  (**Figure S5**). This  
453 dynamic is interesting as these parameters inform vaccination behavior, hinting that high  
454 vaccination rates could reduce a populations' expected vaccine confidence. Vaccination coverage  
455 and vaccine confidence remain low when cultural selection does not favor vaccination ( $\sigma_{\max} \lesssim 0$ ),  
456 i.e. parents vaccinate their children at or below the levels expected based on cultural  
457 transmission rates.

### 458 **3.3. Offspring can Change their Inherited Hesitancy State (Vertical and Oblique Dynamics)**

460  
461 Increased exposure to the attitudes of the broader community (i.e. oblique cultural  
462 transmission from non-parental adults in the population) could influence and change vaccination  
463 beliefs inherited in childhood. Therefore, we next included these oblique effects in our model to  
464 understand how they might modulate vaccine confidence and vaccination coverage levels. In the  
465 oblique transmission phase of the model, offspring can change their vaccine attitude with some  
466 probability based on the frequency of vaccination in the population (**Figure 2**). Thus, in addition  
467 to the vertical transmission of attitudes and behaviors, phenotype frequencies are further  
468 affected by the probability that adult offspring change their attitude (i.e. transition from vaccine  
469 confident ( $A^+$ ) to hesitant ( $A^-$ ) and vice versa). By modulating the attitude transition probabilities  
470 according to the vaccination coverage, we assume that when vaccine coverage ( $V^+$  frequency,  $x_1 +$   
471  $x_2$ ) is low, disease occurrence is high and the negative effects of the disease are experienced  
472 widely, thus the benefits of being vaccinated (and the costs of not being vaccinated) are more  
473 evident [39,40]. As vaccination coverage ( $V^+$ ) increases in the population, and thus disease  
474 occurrence is low, the benefits to being vaccinated are less obvious, while low-probability costs  
475 such as adverse reactions become more apparent and could be perceived as being riskier than  
476 the disease itself.

477 The addition of oblique dynamics produces a pattern of vaccination coverage and vaccine  
478 confidence similar to that of simulations run with solely vertical transmission (**Figure 6 and Figure**  
479 **7 compared to Figure 8 and Figure 9, and Figures 3-4 compared to Figures S2-4**)—the level of  
480 (vertical) vaccine confidence transmission still largely determines the level of vaccination  
481 coverage and vaccine confidence (**Figure 8**). However, oblique cultural influences expanded the  
482 polymorphic space, resulting in a wider range of intermediate  $C_n$  in which the different states of

483 each trait (vaccinated, unvaccinated, confident, and hesitant) are present in the population in  
 484 roughly equal proportions. In other words, there is a wider horizontal stripe of moderate values  
 485 between the definitively high and definitively low equilibrium frequencies in **Figure 8** than in  
 486 **Figure 6**). The addition of oblique transmission appears to lead to less polarized results overall,  
 487 moving the equilibrium levels of vaccination coverage and vaccine confidence away from extreme  
 488 values.  
 489

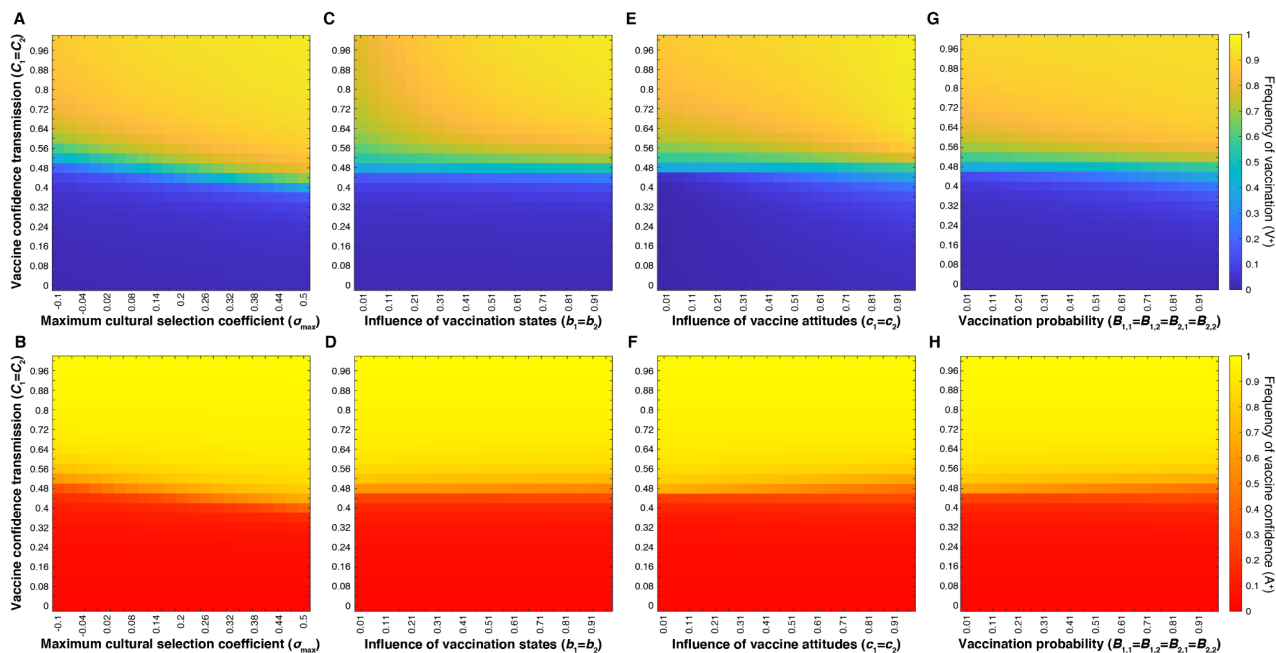

490  
 491 **Figure 8: Vaccine confidence transmission dictates vaccination coverage and confidence levels (with**  
 492 **oblique transmission).** Heatmaps showing final vaccination coverage (i.e. frequency of  $V^+$  in the  
 493 population, with low coverage in blue and high coverage in yellow (**A, C, E, G**)) and final vaccine  
 494 confidence (i.e. frequency of  $A^+$ , with low confidence in red and high confidence in yellow (**B, D, F, H**))  
 495 after 100 time-steps in which oblique transmission of vaccine attitude can occur after parent-to-offspring  
 496 transmission. The likelihood that individuals change their vaccine beliefs depends on the current  
 497 vaccination coverage of the population (**Figure 2**). Unless varied on the horizontal or vertical axes, other  
 498 parameters are set to the default values given in **Table 1**. Parents' likelihood of vaccinating their children  
 499 depends on both their vaccination state and their attitude state; these figures show that the strength of  
 500 parental transmission of vaccine confidence ( $C_n$ ) has a much stronger effect on the equilibrium levels of  
 501 both vaccine coverage ( $V^+$ ) and confidence ( $A^+$ ) than other tested parameters do: the maximum cultural  
 502 selection coefficient,  $\sigma_{max}$ , (**A,B**), the influence of parental vaccination state,  $b_m$ , (**C, D**), the level of  
 503 influence of parental attitudes on their vaccination behaviors,  $c_n$ , (**E,F**), and offspring vaccination  
 504 probability,  $B_{m,n}$  (**G,H**).  
 505

506 With neutral confidence transmission ( $C_1 = C_2 = 0.5$ ), we also observe an expansion of the  
 507 polymorphic space when we modulate cultural selection ( $\sigma_{max}$ ) alongside the influence and  
 508 transmission parameters (**Figure 9**). Interestingly, in the cultural environment defined by this

509 parameter space, we observe a pattern that deviates from the expected association between  
 510 high vaccine confidence and high vaccination coverage: as the influence of vaccine attitudes ( $c_n$ )  
 511 and vaccination probabilities ( $B_{m,n}$ ) increase (**Figure 9C-F**), the population's equilibrium  
 512 vaccination coverage increases while its vaccine confidence decreases. This pattern persisted  
 513 across all tested levels of maximum cultural selection ( $\sigma_{\max}$ ) (**Figure 9C-F**). In other words, we  
 514 observe higher levels of confidence when the influence of vaccine attitude is low (**Figure 9D**) and  
 515 vaccination probabilities are low (**Figure 9F**) than we do at higher values.  
 516

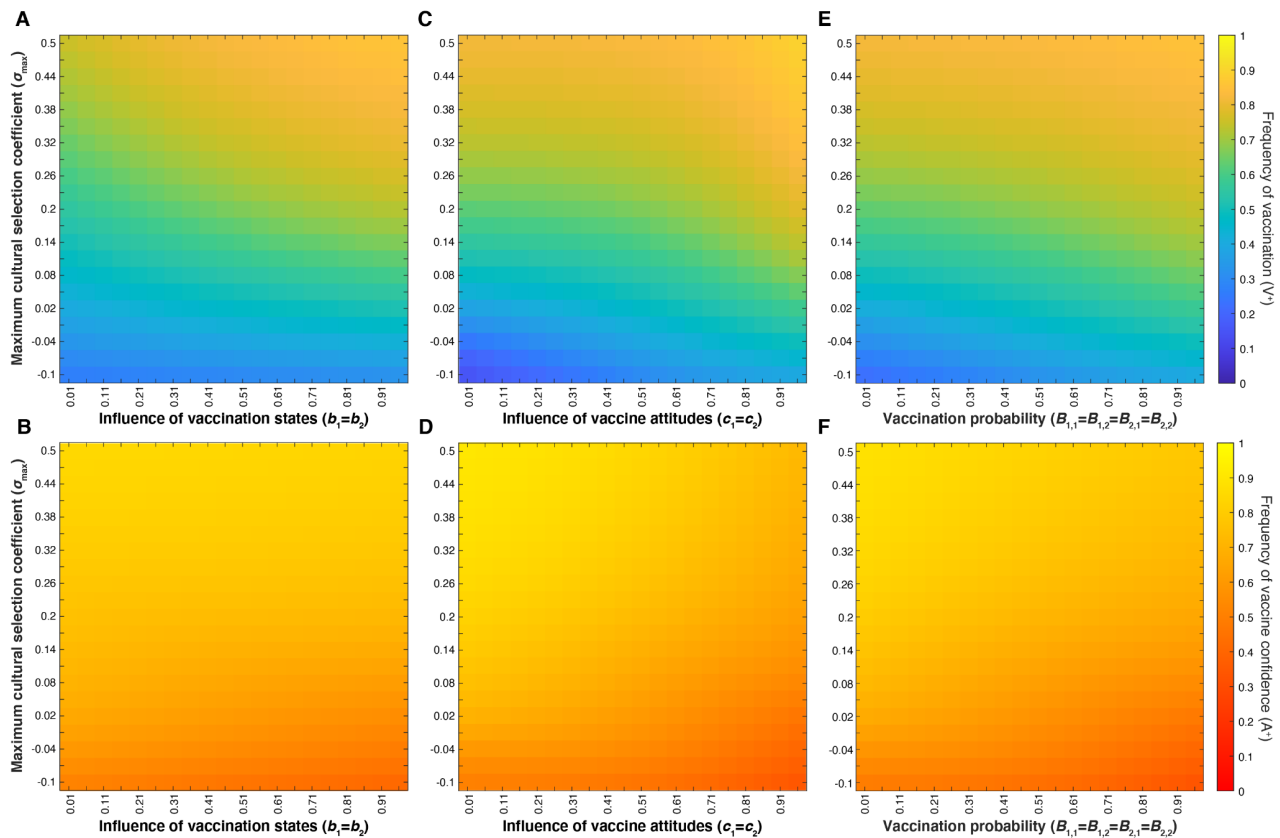

517 **Figure 9: Cultural selection influences vaccination coverage and vaccine confidence (with oblique**  
 518 **transmission).** Heatmaps showing final vaccination coverage (**A, C, E**) and final vaccination confidence (**B,**  
 519 **D, F**) after 100 time-steps **with oblique transmission**. As in previous figures, parameters not varied are  
 520 given in **Table 1**. Parents' likelihood of vaccinating their children depends on both their vaccination state  
 521 and their attitude state. At default probabilities of vaccine confidence transmission ( $C_n$ ), these figures  
 522 show that modulating the maximum cultural selection coefficient affects the equilibrium levels of  
 523 vaccination coverage and vaccine confidence across the range of specified parameters: parental  
 524 vaccination state influence,  $b_m$  (**A, B**), parental attitude state influence,  $c_n$  (**C, D**), and offspring vaccination  
 525 probability,  $B_{m,n}$  (**E, F**). Unless directly varied (as in panels **E-F**),  $B_{m,n}$  varies as  $b_m$  and  $c_n$  are varied, as shown  
 526 in **Table 1**.  
 527  
 528

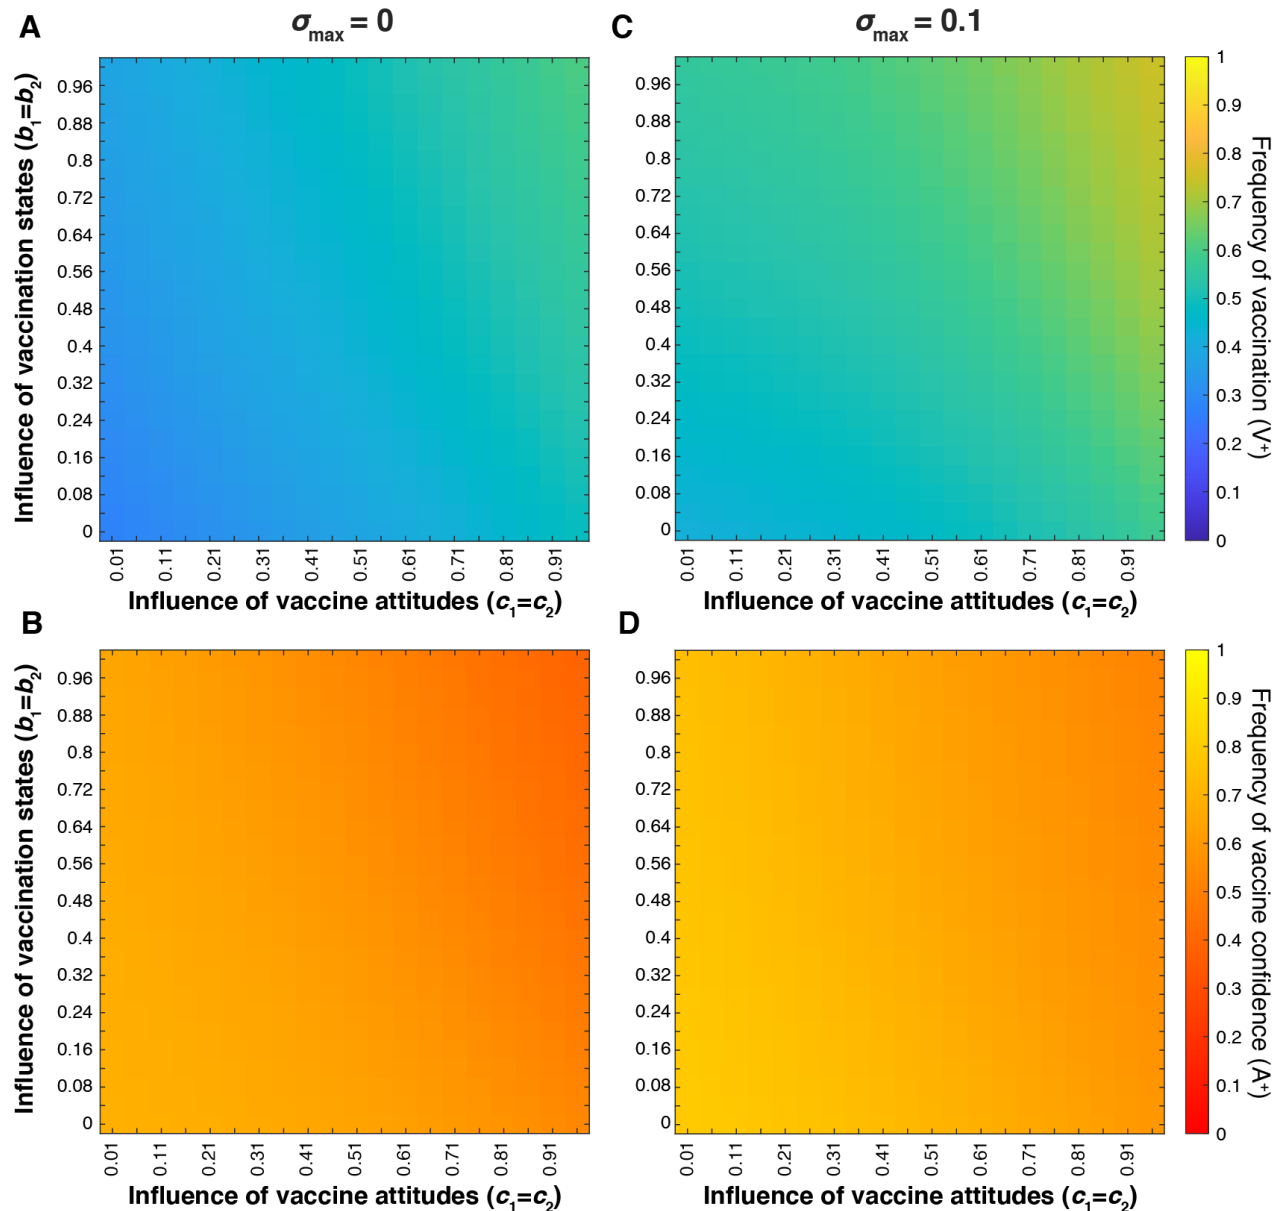

529  
 530 **Figure 10: The influence of parental traits on vaccination coverage and vaccine confidence at different**  
 531 **levels of cultural selection.** Heatmaps showing final vaccination coverage (A, C) and final vaccination  
 532 confidence (B, D) after 100 timesteps **with oblique transmission**. We modulate the interaction between  
 533 vaccination state influence ( $b_m$ ; vertical axis) and attitude influence ( $c_n$ ; horizontal axis) at various  
 534 maximum cultural selection coefficients:  $\sigma_{\max} = 0$  (A, B) and  $\sigma_{\max} = 0.1$  (C, D). As in previous figures,  
 535 unvaried parameters are given in **Table 1**. Vaccination frequency increases as both influence probabilities  
 536 increase and vaccine confidence decreases as both influence probabilities increase.

537  
 538 We explored the interaction between the influence parameters,  $b_m$  and  $c_n$ , at various  
 539 maximum cultural selection coefficients ( $\sigma_{\max}$ ) (**Figure 10**). Vaccination coverage and vaccine  
 540 confidence equilibrate at mid-range frequencies (between 0.3 and 0.8) across the range of  $b_m$  and

541  $c_n$ , indicating that these trait frequencies are not particularly sensitive to either parameter.  
542 Cultural selection favoring vaccination increases the equilibrium level of vaccination coverage and  
543 vaccine confidence (**Figure 10 and Figure S6**). The most notable deviation between equilibrium  
544 confidence and vaccination frequencies occurs at the intersection of the highest influence  
545 parameter values ( $b_m$  and  $c_n$ ), circumstances in which the parents' vaccination states and vaccine  
546 attitudes overwhelmingly support offspring vaccination. In this top right section of the heat maps,  
547 vaccination coverage is high while vaccine confidence is lower, indicating a behavioral pattern in  
548 which mixed-trait couples are more inclined to vaccinate their offspring than transmit vaccine  
549 confidence. Overall, the addition of oblique transmission to a population that would otherwise  
550 equilibrate at high vaccination coverage (**Figure S5**) leads to increased attitude transition to  
551 vaccine hesitancy and subsequently lower vaccine coverage.

552

### 553 **3.4. Mating Preferences**

554

555 We hypothesized that mating preference (assortative mating) could modulate belief and  
556 behavior dynamics and thus the vaccination coverage and confidence levels in the population. If  
557 individuals are more likely to pair with individuals of the same vaccine attitude, such that same-  
558 attitude couples become more common and mixed-attitude couples are less common, the  
559 parameter values for mixed-attitude couples may have less impact on vaccination coverage and  
560 confidence dynamics. Therefore, we analyzed the interaction between A<sup>+</sup> homophily (with  $\alpha_1$   
561 indicating the preference of A<sup>+</sup> individuals for other A<sup>+</sup> individuals) and A<sup>-</sup> homophily (with  $\alpha_2$   
562 indicating the preference of A<sup>-</sup> individuals for other A<sup>-</sup> individuals) at various  $\sigma_{\max}$  levels. When  
563 vaccine attitudes are transmitted both from parent to offspring and between unrelated  
564 individuals (vertical and oblique transmission) and there is neither cultural selection for nor  
565 against being vaccinated ( $\sigma_{\max} = 0$ ), we observe a threshold region at roughly equal mating  
566 preferences ( $\alpha_1 \approx \alpha_2$ ; diagonal lines in **Figure 11C-D**); above this boundary (when  $\alpha_1 > \alpha_2$ )  
567 vaccination coverage and confidence are much higher than below this boundary (when  $\alpha_1 < \alpha_2$ ).  
568 When cultural selection explicitly does not favor vaccination (e.g.  $\sigma_{\max} = -0.1$ , **Figure 11A-B**), low  
569 vaccination coverage and confidence can occur even when there are more vaccine confident  
570 couples in the population than hesitant couples ( $\alpha_1 > \alpha_2$ ). Likewise, if cultural selection favors  
571 being vaccinated ( $\sigma_{\max} > 0$ , **Figure 11E-H**), the threshold between high and low equilibrium values  
572 is shifted, such that high coverage and high confidence levels can potentially be attained even

573 when vaccine hesitant individuals preferentially pair with each other more than vaccine confident  
 574 individuals do ( $\alpha_1 < \alpha_2$ ). We observe qualitatively similar patterns when vaccine attitudes are only  
 575 transmitted from parent to offspring (**Figure S7**); as we have previously observed in **Figures 8-10**,  
 576 the addition of oblique transmission leads to a broader polymorphic region than vertical  
 577 transmission alone. These patterns illustrate two overarching themes: 1) preferential interactions  
 578 between individuals with similar vaccine beliefs can dramatically shift the equilibrium levels of  
 579 vaccination coverage and confidence with all other parameters remaining equal, and 2) the actual  
 580 and perceived quality and efficacy of the vaccine are important to determining vaccine  
 581 acceptance.  
 582

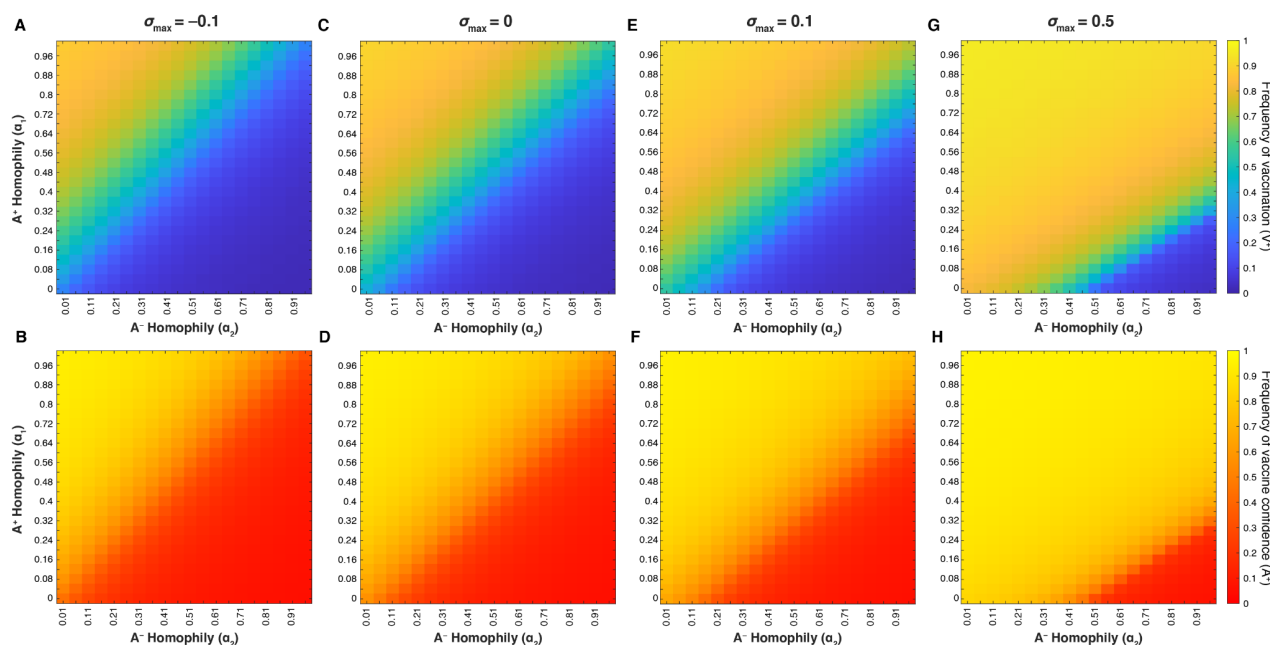

583  
 584 **Figure 11: Homophily between individuals with similar vaccine beliefs can shift equilibrium frequencies**  
 585 **of both vaccination coverage (A, C, E, G) and final vaccine confidence (B, D, F, H) after 100 timesteps with oblique transmission.** As in previous  
 586 figures, unspecified parameters are given in **Table 1**. As vaccine-hesitant individuals ( $A^-$ ) increasingly  
 587 prefer to pair with one another ( $\alpha_2$ ; horizontal axis), vaccine-confident individuals ( $A^+$ ) must also  
 588 preferentially interact to maintain high vaccine coverage ( $\alpha_1$ ; vertical axis); this tradeoff is modulated by  
 589 the cultural selection pressures on vaccination ( $\sigma_{\max} = -0.1$  (A, B),  $\sigma_{\max} = 0$  (C, D) and  $\sigma_{\max} = 0.1$  (E, F),  $\sigma_{\max} =$   
 590 0.5 (G, H)).  
 591

#### 592 593 **4. Discussion**

594  
 595 In this manuscript, we present a simplified model of a complex process: the spread of vaccine  
 596 attitudes and their effects on childhood vaccination frequency in a population. Increasing and



597 maintaining sufficient vaccination coverage to combat disease is more complex than simply  
598 increasing vaccine availability or providing accurate information. A number of factors affect a  
599 person’s vaccine-related beliefs and parents’ decision to vaccinate their children, including their  
600 history with vaccinations and perception of the disease and vaccine effects. As such, it is  
601 important that we understand how these personal factors can shape vaccination cultures and  
602 thus affect public health. Using a cultural niche construction framework, we modeled the  
603 transmission of vaccine attitudes and vaccination behavior in a variety of circumstances and  
604 measured the resulting levels of vaccination coverage and vaccine confidence in the population.  
605 Using this novel approach of modeling dynamically interacting beliefs and behaviors, we are able  
606 to explore the interplay of cultural factors that drive vaccine attitudes and vaccination behavior,  
607 providing insight into how vaccination cultures are formed, maintained, and evolve.

608 Our model demonstrates that the cultural landscape—current policies, transmission patterns  
609 of beliefs and behaviors, etc.—can be more predictive of future levels of vaccine coverage and  
610 confidence than current coverage and confidence levels in the population. Our simulations each  
611 approached a stable equilibrium, and in general we could infer that a population with high  
612 vaccination coverage will have low rates of vaccine hesitancy and vice versa. Further, our model  
613 shows vaccine confidence transmission ( $C_n$ ) to be the parameter that most strongly determines  
614 vaccination coverage and confidence levels. That is, even though parents’ decision to vaccinate  
615 their children is based on both their level of confidence in vaccines and a consideration of their  
616 own vaccination status, the probability of transmitting vaccine-positive attitudes is a stronger  
617 predictor of future vaccination coverage than the probability of vaccination itself (**Figures 6 and**  
618 **8**). Finally, our simulations also suggest that a pro-vaccination health culture can be undermined  
619 by a vaccine hesitancy “echo chamber”, possibly formed by a higher degree of preferential  
620 assortment (homophily) among vaccine-hesitant individuals, who then form pairs more likely to  
621 transmit vaccine-hesitancy to their children. Taken together, our results support the importance  
622 of considering the cultural factors that have shaped current health-related beliefs and behaviors  
623 if health policies aim to maintain or change the current conditions.

624 This model also shows that the perceived value and efficacy of a vaccine are important to  
625 maintaining sufficient levels of vaccination coverage, especially if vaccine confidence is not being  
626 robustly transmitted (or maintained in adulthood). Individuals essentially perform an internal  
627 cost-benefit analysis based on their circumstances and interpretation of accessible information  
628 when deciding to vaccinate. We aimed to be inclusive of their various considerations via our

629 comprehensive cultural selection coefficient. Increasing positive public perception through  
630 honest and effective communication and reducing public concern about vaccines and increasing  
631 vaccine safety could together drive increased vaccination trust and acceptance. Achieving the  
632 optimal vaccination coverage lies not only in the hands of the public by vaccinating themselves  
633 and their children, but also in the efforts of health officials and leaders in creating an  
634 environment that fosters confidence by assuring the public of vaccine efficacy, safety, and value,  
635 while providing convenient avenues to attain vaccines.

636 As with any model, we cannot fully capture the complex reality of the relationship  
637 between vaccine hesitancy and vaccination behavior. First, though vaccination frequency data is  
638 available for numerous vaccines, frequency data for vaccine attitudes are much less common,  
639 with the two traditionally not surveyed together. Thus, there is no dataset that exactly estimates  
640 the phenotypes presented here, for example, the number of vaccinated but hesitant ( $V^+A^-$ )  
641 individuals in a population. The goals of vaccination attitude surveys have been primarily to  
642 identify themes of vaccine hesitancy, and to a lesser degree, the themes of vaccination. However,  
643 they do not report parent vaccination states or whether the child was actually vaccinated (on  
644 schedule). With data presenting parent vaccination states alongside their vaccine attitudes and  
645 vaccination decisions, we would be able to more accurately inform phenotype frequencies,  
646 possibly extending the model to incorporate various types of hesitancy. We note, however, that  
647 our results did not depend on the initial proportions of vaccination status or vaccine hesitancy, so  
648 these data would primarily be for comparison to our equilibrium outcomes.

649 We were also constrained by limited data to inform our cultural transmission and  
650 transition probabilities. In our model, baseline confidence transmission and influence  
651 probabilities are structured according to a simple pattern of inheritance, such that each parent is  
652 equally likely to influence an offspring's phenotype. However, cultural traits and vaccination  
653 attitudes may not strictly follow this pattern: one parent might have more influence, or one  
654 variant of a trait might be more likely to be transmitted. In addition, transmission probabilities  
655 are constant in our model, remaining unaffected by changing cultural conditions throughout each  
656 simulation, but in reality, these probabilities may fluctuate in response to a variety of factors  
657 including vaccine type or family structure. Future developments of the model could include  
658 modulating the probability of vaccine confidence transmission according to other aspects of the  
659 cultural environment, such as the attitude frequencies in the population. We could also use the  
660 current frequency of these cultural traits across different populations to generate more specific

661 hypotheses about their underlying cultural transmission processes [41,42] Our cultural selection  
662 coefficient and attitude transition probabilities did vary with the frequency of vaccination  
663 coverage, but the exact relationships could not be informed by existing data. Modulating both  
664 the attitude transition probabilities and the cultural selection coefficient according to the level of  
665 vaccination coverage in a population, however, reflects that perceptions about the vaccine and  
666 its associated effects on health could be meaningfully different in a population with high  
667 vaccination coverage than in one with low coverage.

668         Though vaccination coverage and vaccine confidence stabilized in our simulations, in  
669 reality vaccination rates fluctuate over time in response to changing population dynamics,  
670 perhaps never arriving at a stable equilibrium. For example, the increasingly rapid spread of  
671 information [43] may cause attitudes and behaviors to change frequently over short periods of  
672 time. In our model, most of the phenotype frequency fluctuations occur in the first few iterations  
673 before quickly adjusting to an equilibrium. Unlike some models of population dynamics, this  
674 model has a discrete-time format and does not consider asynchrony in population turnover.  
675 Thus, the timescale of our model might not translate directly to years or generations, and we  
676 avoid interpreting the number of iterations in literal terms. It is possible that if more realistic  
677 birth and death processes were incorporated, the cultural dynamics would occur at different  
678 timescales and would continue to fluctuate instead of approaching a stable equilibrium. In  
679 addition, the grandparents of the children to be vaccinated also influence the parents'  
680 vaccination decisions [44]. A restructuring of the timescale or the incorporation of population  
681 asynchrony in our model could allow for consideration of these influences.

682         In this model, we constructed the offspring vaccination probability to be informed  
683 primarily by parents' vaccine attitudes and secondarily by their own vaccination status. Though it  
684 is understood that there is an interaction between parents' beliefs and their own experiences  
685 with vaccines regarding their decision to vaccinate their children, accurately modeling the relative  
686 contribution of these two factors could benefit from empirical studies on parental willingness to  
687 vaccinate based on their beliefs and vaccination status. With our current formula ( $B_{m,n}$ , **Table S2**),  
688 vaccine-confident parents who did not themselves receive childhood vaccines have a reduced  
689 likelihood of vaccinating their offspring than vaccinated parents. In reality, parental vaccine  
690 attitudes might even further outweigh their own vaccination status in their decision-making  
691 process than we model here.

692 Finally, future developments of this model could include homophily of oblique  
693 interactions, that is, if vaccine-related beliefs influenced not only one's mate choice but also  
694 one's choice of social groups or information sources. On one hand, individuals who  
695 disproportionately interact with vaccine-hesitant contacts would have a biased perspective that  
696 vaccine hesitancy is more prevalent in the population than it actually is, which can reduce their  
697 likelihood of vaccinating their children [45]; on the other hand, a high degree of homophily in  
698 oblique interactions has been hypothesized to hinder the transmission of vaccine hesitancy to  
699 vaccine confident individuals, reducing the spread of the belief overall [28]. Another potential  
700 further exploration of the model includes modeling preferential assortment based on vaccination  
701 status rather than vaccine attitude, which has been shown to occur in an empirical contact-  
702 network study of high school students [46].

703 Our findings suggest that broad efforts to encourage and inform the public about vaccine  
704 safety and efficacy will foster higher vaccine coverage, and thus points toward several  
705 recommendations for public health policy and outreach. We recommend that accurate  
706 information about vaccines be readily accessible through a variety of means, be easily  
707 understood, and be supported by personal anecdotes since individuals who are skeptical about  
708 vaccines might invest more time in seeking out information about them [47–49], and that  
709 dialogue between people with different beliefs and attitudes be encouraged as it can help to  
710 break the “echo chambers” of homophily, encouraging individuals to communicate and  
711 empathize with one another. Therefore, to address vaccine hesitancy, our results underscore the  
712 importance of considering the cultural beliefs and influences that underpin health behaviors.

713

## 714 **5. Acknowledgements**

715

716 We are grateful for feedback on this model from Glenn Webb, Ann Tate, Tony Capra,  
717 Kathy Friedman, Buddy Creech, and members of the Creanza lab. We thank the John Templeton  
718 Foundation for funding this work.

719

720

## 721 References:

- 722 1. Laland K, Matthews B, Feldman MW. An introduction to niche construction theory. *Evol Ecol.*  
723 2016;30: 191–202.
- 724 2. John Odling-Smee F, Laland KN, Feldman MW. *Niche Construction: The Neglected Process in*  
725 *Evolution (MPB-37)*. Princeton University Press; 2013.
- 726 3. Fogarty L, Creanza N. The niche construction of cultural complexity: interactions between  
727 innovations, population size and the environment. *Philos Trans R Soc Lond B Biol Sci.* 2017;372.  
728 doi:10.1098/rstb.2016.0428
- 729 4. O'Brien MJ, Laland KN, Broughton JM, Cannon MD, Fuentes A, Gerbault P, et al. Genes, culture, and  
730 agriculture: An example of human niche construction. *Curr Anthropol.* 2012;53: 000–000.
- 731 5. Fuentes A. Cooperation, conflict, and niche construction in the genus homo. *War, peace, and human*  
732 *nature.* 2013; 78–94.
- 733 6. Creanza N, Fogarty L, Feldman MW. Models of cultural niche construction with selection and  
734 assortative mating. *PLoS One.* 2012;7: e42744.
- 735 7. Creanza N, Feldman MW. Complexity in models of cultural niche construction with selection and  
736 homophily. *Proc Natl Acad Sci U S A.* 2014;111 Suppl 3: 10830–10837.
- 737 8. Fenner F. A successful eradication campaign. *Global eradication of smallpox. Rev Infect Dis.* 1982;4:  
738 916–930.
- 739 9. Kim-Farley R, Schonberger L, Nkowane B, Kew O, Bart K, Orenstein W, et al. POLIOMYELITIS IN THE  
740 USA: VIRTUAL ELIMINATION OF DISEASE CAUSED BY WILD VIRUS. *The Lancet.* 1984. pp. 1315–1317.  
741 doi:10.1016/s0140-6736(84)90829-8
- 742 10. Salk D. Eradication of Poliomyelitis in the United States. I. Live Virus Vaccine-Associated and Wild  
743 Poliovirus Disease. *Clinical Infectious Diseases.* 1980. pp. 228–242. doi:10.1093/clinids/2.2.228
- 744 11. Thompson KM, Strebel PM, Dabbagh A, Cherian T, Cochi SL. Enabling implementation of the Global  
745 Vaccine Action Plan: developing investment cases to achieve targets for measles and rubella  
746 prevention. *Vaccine.* 2013;31 Suppl 2: B149–56.
- 747 12. Atwell JE, Salmon DA. Pertussis resurgence and vaccine uptake: implications for reducing vaccine  
748 hesitancy. *Pediatrics.* 2014. pp. 602–604.
- 749 13. Kubin L. Is There a Resurgence of Vaccine Preventable Diseases in the U.S.? *Journal of Pediatric*  
750 *Nursing.* 2019. pp. 115–118. doi:10.1016/j.pedn.2018.11.011
- 751 14. Falagas ME, Zarkadoulia E. Factors associated with suboptimal compliance to vaccinations in children  
752 in developed countries: a systematic review. *Curr Med Res Opin.* 2008;24: 1719–1741.
- 753 15. Dubé E, Laberge C, Guay M, Bramadat P, Roy R, Bettinger J. Vaccine hesitancy: an overview. *Hum*  
754 *Vaccin Immunother.* 2013;9: 1763–1773.
- 755 16. Scheres J, Kuszewski K. The Ten Threats to Global Health in 2018 and 2019. A welcome and  
756 informative communication of WHO to everybody. *Zdrowie Publiczne i Zarządzanie.* 2019. pp. 2–8.  
757 doi:10.4467/20842627oz.19.001.11297
- 758 17. Glanz JM, McClure DL, Magid DJ, Daley MF, France EK, Salmon DA, et al. Parental refusal of pertussis  
759 vaccination is associated with an increased risk of pertussis infection in children. *Pediatrics.* 2009;123:  
760 1446–1451.
- 761 18. MacDonald NE, SAGE Working Group on Vaccine Hesitancy. *Vaccine hesitancy: Definition, scope and*

- 762 determinants. *Vaccine*. 2015;33: 4161–4164.
- 763 19. Eggertson L. Lancet retracts 12-year-old article linking autism to MMR vaccines. *CMAJ*. 2010;182:  
764 E199–200.
- 765 20. Rao TSS, Andrade C. The MMR vaccine and autism: Sensation, refutation, retraction, and fraud.  
766 *Indian J Psychiatry*. 2011;53: 95–96.
- 767 21. Burley N. The meaning of assortative mating. *Ethol Sociobiol*. 1983;4: 191–203.
- 768 22. Gimelfarb A. Processes of Pair Formation Leading to Assortative Mating in Biological Populations:  
769 Encounter-Mating Model. *The American Naturalist*. 1988. pp. 865–884. doi:10.1086/284827
- 770 23. Salathé M, Bonhoeffer S. The effect of opinion clustering on disease outbreaks. *J R Soc Interface*.  
771 2008;5: 1505–1508.
- 772 24. Perra N, Balcan D, Gonçalves B, Vespignani A. Towards a characterization of behavior-disease models.  
773 *PLoS One*. 2011;6: e23084.
- 774 25. Mao L, Yang Y. Coupling infectious diseases, human preventive behavior, and networks—a conceptual  
775 framework for epidemic modeling. *Soc Sci Med*. 2012;74: 167–175.
- 776 26. Bauch CT. Imitation dynamics predict vaccinating behaviour. *Proc Biol Sci*. 2005;272: 1669–1675.
- 777 27. Chauhan S, Misra OP, Dhar J. Stability analysis of SIR model with vaccination. *American journal of*  
778 *computational and applied mathematics*. 2014;4: 17–23.
- 779 28. Mehta RS, Rosenberg NA. Modelling anti-vaccine sentiment as a cultural pathogen. *Evolutionary*  
780 *Human Sciences*. 2020;2: e21.
- 781 29. May T, Silverman RD. “Clustering of exemptions” as a collective action threat to herd immunity.  
782 *Vaccine*. 2003;21: 1048–1051.
- 783 30. Wang E, Clymer J, Davis-Hayes C, Bутtenheim A. Nonmedical exemptions from school immunization  
784 requirements: a systematic review. *Am J Public Health*. 2014;104: e62–84.
- 785 31. Phadke VK, Bednarczyk RA, Salmon DA, Omer SB. Association Between Vaccine Refusal and Vaccine-  
786 Preventable Diseases in the United States: A Review of Measles and Pertussis. *JAMA*. 2016;315:  
787 1149–1158.
- 788 32. Pruitt RH, Kline PM, Kovaz RB. Perceived Barriers to Childhood Immunization Among Rural  
789 Populations. *Journal of Community Health Nursing*. 1995. pp. 65–72.  
790 doi:10.1207/s15327655jchn1202\_1
- 791 33. Cavalli-Sforza LL, Feldman MW. Cultural transmission and evolution: a quantitative approach. *Monogr*  
792 *Popul Biol*. 1981;16: 1–388.
- 793 34. Bauch CT, Bhattacharyya S. Evolutionary game theory and social learning can determine how vaccine  
794 scares unfold. *PLoS Comput Biol*. 2012;8: e1002452.
- 795 35. Kennedy AM, Brown CJ, Gust DA. Vaccine beliefs of parents who oppose compulsory vaccination.  
796 *Public Health Rep*. 2005;120: 252–258.
- 797 36. Leask J. Target the fence-sitters. *Nature*. 2011;473: 443–445.
- 798 37. Hill HA, Singleton JA, Yankey D, Elam-Evans LD, Cassandra Pingali S, Kang Y. Vaccination Coverage by  
799 Age 24 Months Among Children Born in 2015 and 2016 — National Immunization Survey-Child,  
800 United States, 2016–2018. *MMWR. Morbidity and Mortality Weekly Report*. 2019. pp. 913–918.  
801 doi:10.15585/mmwr.mm6841e2
- 802 38. Hill HA, Elam-Evans LD, Yankey D, Singleton JA, Kang Y. Vaccination Coverage Among Children Aged

- 803 19–35 Months — United States, 2016. *MMWR. Morbidity and Mortality Weekly Report*. 2017. pp.  
804 1171–1177. doi:10.15585/mmwr.mm6643a3
- 805 39. Gangarosa EJ, Galazka AM, Wolfe CR, Phillips LM, Gangarosa RE, Miller E, et al. Impact of anti-vaccine  
806 movements on pertussis control: the untold story. *Lancet*. 1998;351: 356–361.
- 807 40. Ozawa S, Mirelman A, Stack ML, Walker DG, Levine OS. Cost-effectiveness and economic benefits of  
808 vaccines in low- and middle-income countries: a systematic review. *Vaccine*. 2012;31: 96–108.
- 809 41. Kandler A, Powell A. Generative inference for cultural evolution. *Philos Trans R Soc Lond B Biol Sci*.  
810 2018;373. doi:10.1098/rstb.2017.0056
- 811 42. Kandler A, Wilder B, Fortunato L. Inferring individual-level processes from population-level patterns  
812 in cultural evolution. *R Soc Open Sci*. 2017;4: 170949.
- 813 43. Hornik J, Satchi RS, Cesareo L, Pastore A. Information dissemination via electronic word-of-mouth:  
814 Good news travels fast, bad news travels faster! *Computers in Human Behavior*. 2015. pp. 273–280.  
815 doi:10.1016/j.chb.2014.11.008
- 816 44. Karthigesu SP, Chisholm JS, Coall DA. Do grandparents influence parents’ decision to vaccinate their  
817 children? A systematic review. *Vaccine*. 2018;36: 7456–7462.
- 818 45. Brunson EK. The Impact of Social Networks on Parents’ Vaccination Decisions. *Immunization*  
819 *Strategies and Practices*. 2018. pp. 123–133. doi:10.1542/9781610022774-the\_impact
- 820 46. Barclay VC, Smieszek T, He J, Cao G, Rainey JJ, Gao H, et al. Positive network assortativity of influenza  
821 vaccination at a high school: implications for outbreak risk and herd immunity. *PLoS One*. 2014;9:  
822 e87042.
- 823 47. Gowda C, Dempsey AF. The rise (and fall?) of parental vaccine hesitancy. *Hum Vaccin Immunother*.  
824 2013;9: 1755–1762.
- 825 48. Ellithorpe ME, Adams R, Aladé F. Parents’ Behaviors and Experiences Associated with Four  
826 Vaccination Behavior Groups for Childhood Vaccine Hesitancy. *Matern Child Health J*. 2022;26: 280–  
827 288.
- 828 49. Benin AL, Wisler-Scher DJ, Colson E, Shapiro ED, Holmboe ES. Qualitative Analysis of Mothers’  
829 Decision-Making About Vaccines for Infants: The Importance of Trust. *Pediatrics*. 2006. pp. 1532–  
830 1541. doi:10.1542/peds.2005-1728
- 831
